# Supplementary material for: Enhancing the correlation betweenin vitroandin vivoexperiments in dental implant osseointegration: investigating the role of Ca ions
Source: Royal Society of Chemistry journal article supplement (doi:10.1039/d3tb02694a), 2024-01-01
Supplement: d3tb02694a1.pdf [file d3tb02694a1.pdf]

**Supplementary Table 1.** Comparative analysis between the proteomic results obtained with the THP-1 cultured on UnicCa with respect the proteomic results obtained with C samples at 1 and 3 days. Proteins with  $p \leq 0.05$  (yellow) and a ratio higher than 1.5 in either direction were considered as significantly different. Up-regulated proteins in THP-1 cultured on UnicCa are marked in red, while those downregulated are marked in green.

| Uniprot entry | Protein name                                               | Unique peptide | Day 1   |                | Day 3   |                |
|---------------|------------------------------------------------------------|----------------|---------|----------------|---------|----------------|
|               |                                                            |                | p value | Ratio UnicCa/C | p value | Ratio UnicCa/C |
| CO7A1_HUMAN   | Collagen alpha-1(VII) chain                                | 5              | 8,2E-04 | 26,36          | 1,0E-02 | 8,27           |
| HIBCH_HUMAN   | 3-hydroxyisobutyryl-CoA hydrolase mitochondrial            | 7              | 6,1E-01 | 1,50           | 2,1E-03 | 7,32           |
| MSH2_HUMAN    | DNA mismatch repair protein Msh2                           | 3              | 9,6E-01 | 0,95           | 1,1E-02 | 7,30           |
| CHKB_HUMAN    | Choline/ethanolamine kinase                                | 3              | 1,3E-01 | 3,72           | 4,5E-04 | 5,12           |
| PCH2_HUMAN    | Pachytene checkpoint protein 2 homolog                     | 3              | 2,2E-01 | 3,23           | 4,1E-03 | 5,08           |
| SCRB1_HUMAN   | Scavenger receptor class B member 1                        | 2              | 8,4E-01 | 0,78           | 3,7E-02 | 4,61           |
| CNOT9_HUMAN   | CCR4-NOT transcription complex subunit 9                   | 4              | 2,3E-01 | 3,33           | 3,9E-02 | 4,43           |
| IPP2_HUMAN    | Protein phosphatase inhibitor 2                            | 2              | 3,0E-02 | 0,04           | 2,7E-01 | 4,20           |
| GRWD1_HUMAN   | Glutamate-rich WD repeat-containing protein 1              | 7              | 8,3E-03 | 0,15           | 1,4E-01 | 3,81           |
| GSLG1_HUMAN   | Golgi apparatus protein 1                                  | 20             | 4,0E-01 | 2,33           | 2,6E-02 | 3,74           |
| MEPCE_HUMAN   | 7SK snRNA methylphosphate capping enzyme                   | 4              | 5,1E-01 | 1,71           | 4,1E-02 | 3,71           |
| RL27A_HUMAN   | 60S ribosomal protein L27a                                 | 7              | 3,9E-02 | 0,39           | 2,9E-01 | 3,68           |
| NU214_HUMAN   | Nuclear pore complex protein Nup214                        | 8              | 6,1E-01 | 1,31           | 1,6E-02 | 3,19           |
| NH2L1_HUMAN   | NHP2-like protein 1                                        | 6              | 6,5E-01 | 1,44           | 1,1E-02 | 3,15           |
| CBWD1_HUMAN   | COBW domain-containing protein 1                           | 3              | 9,3E-03 | 5,22           | 2,4E-01 | 3,14           |
| HGD_HUMAN     | Homogentisate 1 2-dioxygenase                              | 7              | 2,8E-01 | 3,79           | 1,9E-02 | 3,12           |
| RM28_HUMAN    | 39S ribosomal protein L28 mitochondrial                    | 2              | 7,0E-02 | 2,92           | 7,1E-03 | 3,09           |
| PNPT1_HUMAN   | Polyribonucleotide nucleotidyltransferase 1 mitochondrial  | 12             | 2,0E-02 | 18,72          | 2,6E-01 | 3,08           |
| RM46_HUMAN    | 39S ribosomal protein L46 mitochondrial                    | 2              | 8,4E-01 | 1,15           | 1,4E-02 | 2,98           |
| ITA4_HUMAN    | Integrin alpha-4                                           | 2              | 3,3E-02 | 3,96           | 5,6E-02 | 2,97           |
| RTRAF_HUMAN   | RNA transcription translation and transport factor protein | 6              | 2,8E-02 | 7,64           | 1,8E-01 | 2,96           |
| CBL_HUMAN     | E3 ubiquitin-protein ligase CBL                            | 14             | 9,5E-01 | 1,06           | 3,1E-02 | 2,72           |
| SHIP1_HUMAN   | Phosphatidylinositol 3 4 5-trisphosphate 5-phosphatase 1   | 16             | 3,0E-02 | 0,36           | 1,8E-01 | 2,60           |

|             |                                                                                                         |    |         |       |         |      |
|-------------|---------------------------------------------------------------------------------------------------------|----|---------|-------|---------|------|
| NQO1_HUMAN  | NAD(P)H dehydrogenase [quinone] 1                                                                       | 11 | 3,0E-01 | 2,53  | 3,2E-02 | 2,60 |
| ODP2_HUMAN  | Dihydrolipoyllysine-residue acetyltransferase component of pyruvate dehydrogenase complex mitochondrial | 10 | 2,4E-02 | 4,14  | 1,6E-01 | 2,58 |
| RTN1_HUMAN  | Reticulon-1                                                                                             | 2  | 4,2E-01 | 1,78  | 4,5E-02 | 2,51 |
| NDUF4_HUMAN | NADH dehydrogenase [ubiquinone] 1 alpha subcomplex assembly factor 4                                    | 3  | 2,8E-02 | 2,41  | 3,8E-01 | 2,51 |
| EMC10_HUMAN | ER membrane protein complex subunit 10                                                                  | 2  | 2,2E-02 | 14,84 | 5,1E-01 | 2,46 |
| SYSC_HUMAN  | Serine--tRNA ligase cytoplasmic                                                                         | 17 | 2,2E-02 | 2,76  | 9,1E-02 | 2,41 |
| MIA2_HUMAN  | Melanoma inhibitory activity protein 2                                                                  | 2  | 4,8E-02 | 5,64  | 5,1E-01 | 2,36 |
| TCRG1_HUMAN | Transcription elongation regulator 1                                                                    | 9  | 3,0E-02 | 19,88 | 4,7E-01 | 2,34 |
| NEK9_HUMAN  | Serine/threonine-protein kinase Nek9                                                                    | 7  | 3,0E-01 | 1,71  | 7,6E-03 | 2,33 |
| UBP2L_HUMAN | Ubiquitin-associated protein 2-like                                                                     | 20 | 1,9E-01 | 2,64  | 4,2E-02 | 2,28 |
| UFC1_HUMAN  | Ubiquitin-fold modifier-conjugating enzyme 1                                                            | 5  | 4,7E-02 | 0,29  | 3,5E-01 | 2,23 |
| PDP1_HUMAN  | [Pyruvate dehydrogenase [acetyl-transferring]]-ph phatase 1 mitochondrial                               | 5  | 4,1E-03 | 33,99 | 1,3E-01 | 2,20 |
| RBP56_HUMAN | TATA-binding protein-associated factor 2N                                                               | 4  | 7,9E-01 | 1,19  | 3,7E-02 | 2,20 |
| OCAD1_HUMAN | OCIA domain-containing protein 1                                                                        | 7  | 2,8E-02 | 4,15  | 1,5E-01 | 2,19 |
| PSB6_HUMAN  | Proteasome subunit beta type-6                                                                          | 4  | 7,3E-01 | 1,39  | 3,4E-02 | 2,18 |
| NIPS1_HUMAN | Protein NipSnap homolog 1                                                                               | 5  | 7,0E-01 | 0,75  | 2,5E-02 | 2,18 |
| SHLB1_HUMAN | Endophilin-B1                                                                                           | 10 | 3,1E-01 | 2,11  | 6,3E-03 | 2,14 |
| MYPT1_HUMAN | Protein phosphatase 1 regulatory subunit 12A                                                            | 5  | 4,8E-01 | 1,83  | 2,6E-02 | 2,14 |
| TRPV2_HUMAN | Transient receptor potential cation channel subfamily V member 2                                        | 3  | 4,8E-02 | 4,59  | 3,5E-01 | 2,08 |
| PUR9_HUMAN  | Bifunctional purine biosynthesis protein PURH                                                           | 38 | 7,2E-01 | 0,77  | 3,6E-02 | 2,07 |
| EST1_HUMAN  | Liver carboxylesterase 1                                                                                | 35 | 5,8E-01 | 0,79  | 3,2E-02 | 2,00 |
| PDLI7_HUMAN | PDZ and LIM domain protein 7                                                                            | 4  | 1,2E-02 | 6,83  | 4,1E-01 | 1,98 |
| RPIA_HUMAN  | Ribose-5-phosphate isomerase                                                                            | 2  | 4,2E-01 | 0,59  | 2,8E-02 | 1,95 |
| CO4A_HUMAN  | Complement C4-A                                                                                         | 12 | 4,8E-01 | 1,39  | 3,9E-02 | 1,91 |
| HS74L_HUMAN | Heat shock 70 kDa protein 4L                                                                            | 9  | 2,0E-02 | 0,41  | 4,0E-01 | 1,90 |
| RM09_HUMAN  | 39S ribosomal protein L9 mitochondrial                                                                  | 2  | 3,9E-02 | 0,12  | 2,7E-01 | 1,83 |
| BICD2_HUMAN | Protein bicaudal D homolog 2                                                                            | 2  | 3,0E-02 | 4,19  | 4,0E-01 | 1,78 |

|             |                                                           |    |         |       |         |      |
|-------------|-----------------------------------------------------------|----|---------|-------|---------|------|
| NMI_HUMAN   | N-myc-interactor                                          | 5  | 2,0E-01 | 0,41  | 1,9E-03 | 1,76 |
| LTOR3_HUMAN | Ragulator complex protein LAMTOR3                         | 2  | 4,3E-02 | 2,37  | 2,6E-01 | 1,74 |
| ABHDA_HUMAN | Mycophenolic acid acyl-glucuronide esterase mitochondrial | 2  | 4,8E-02 | 3,64  | 4,3E-01 | 1,71 |
| GRP75_HUMAN | Stress-70 protein mitochondrial                           | 45 | 6,3E-03 | 3,65  | 2,7E-01 | 1,70 |
| RS6_HUMAN   | 40S ribosomal protein S6                                  | 13 | 1,4E-04 | 0,05  | 7,1E-01 | 1,68 |
| BGAL_HUMAN  | Beta-galactosidase                                        | 4  | 4,2E-02 | 4,58  | 2,4E-01 | 1,67 |
| RS10_HUMAN  | 40S ribosomal protein S10                                 | 13 | 2,5E-02 | 1,96  | 1,2E-01 | 1,66 |
| TF2B_HUMAN  | Transcription initiation factor IIB                       | 3  | 2,7E-02 | 10,90 | 7,1E-01 | 1,61 |
| NELFB_HUMAN | Negative elongation factor B                              | 2  | 3,2E-02 | 6,81  | 3,8E-01 | 1,60 |
| RUFY1_HUMAN | RUN and FYVE domain-containing protein 1                  | 10 | 3,8E-02 | 0,29  | 6,5E-01 | 1,59 |
| RSU1_HUMAN  | Ras suppressor protein 1                                  | 5  | 2,3E-02 | 2,47  | 3,5E-01 | 1,59 |
| PSD11_HUMAN | 26S proteasome non-ATPase regulatory subunit 11           | 26 | 4,0E-02 | 2,54  | 2,1E-01 | 1,59 |
| RUVB1_HUMAN | RuvB-like 1                                               | 23 | 2,6E-02 | 2,33  | 2,0E-01 | 1,59 |
| RUXE_HUMAN  | Small nuclear ribonucleoprotein E                         | 4  | 8,1E-03 | 5,98  | 1,1E-01 | 1,59 |
| HUWE1_HUMAN | E3 ubiquitin-protein ligase HUWE1                         | 27 | 2,4E-03 | 2,10  | 2,0E-01 | 1,58 |
| PSB1_HUMAN  | Proteasome subunit beta type-1                            | 11 | 1,1E-02 | 2,31  | 1,3E-01 | 1,57 |
| KCAB2_HUMAN | Voltage-gated potassium channel subunit beta-2            | 13 | 7,8E-03 | 5,25  | 5,2E-01 | 1,56 |
| TBL3_HUMAN  | Transducin beta-like protein 3                            | 7  | 6,0E-02 | 4,20  | 4,1E-02 | 1,56 |
| GGPPS_HUMAN | Geranylgeranyl pyrophosphate synthase                     | 6  | 1,7E-02 | 2,70  | 3,9E-01 | 1,54 |
| ODR4_HUMAN  | Protein odr-4 homolog                                     | 2  | 2,0E-02 | 2,78  | 3,0E-01 | 1,54 |
| RPP30_HUMAN | Ribonuclease P protein subunit p30                        | 2  | 2,2E-02 | 3,71  | 5,2E-01 | 1,54 |
| PTSS1_HUMAN | Phosphatidylserine synthase 1                             | 7  | 9,2E-03 | 11,53 | 5,6E-01 | 1,52 |
| P5CS_HUMAN  | Delta-1-pyrroline-5-carboxylate synthase                  | 4  | 2,0E-02 | 5,49  | 4,6E-01 | 1,51 |
| ESTD_HUMAN  | S-formylglutathione hydrolase                             | 11 | 1,5E-02 | 4,33  | 5,2E-01 | 1,50 |
| LTOR1_HUMAN | Ragulator complex protein LAMTOR1                         | 6  | 5,6E-04 | 4,24  | 2,0E-01 | 1,48 |
| NSUN2_HUMAN | RNA cytosine C(5)-methyltransferase NSUN2                 | 19 | 4,2E-02 | 1,72  | 2,2E-02 | 1,47 |
| ITAX_HUMAN  | Integrin alpha-X                                          | 23 | 3,6E-02 | 2,31  | 3,7E-01 | 1,45 |
| NLTP_HUMAN  | Non-specific lipid-transfer protein                       | 12 | 4,8E-04 | 3,35  | 5,0E-01 | 1,43 |

|             |                                                          |    |         |       |         |      |
|-------------|----------------------------------------------------------|----|---------|-------|---------|------|
| NFKB2_HUMAN | Nuclear factor NF-kappa-B p100 subunit                   | 2  | 4,5E-02 | 5,80  | 5,7E-01 | 1,42 |
| SF01_HUMAN  | Splicing factor 1                                        | 6  | 3,8E-03 | 2,40  | 3,7E-01 | 1,41 |
| NIF3L_HUMAN | NIF3-like protein 1                                      | 2  | 1,8E-02 | 7,23  | 3,7E-01 | 1,39 |
| BNIP2_HUMAN | BCL2/adenovirus E1B 19 kDa protein-interacting protein 2 | 2  | 9,3E-03 | 7,55  | 6,3E-01 | 1,39 |
| THIC_HUMAN  | Acetyl-CoA acetyltransferase cytosolic                   | 9  | 1,4E-02 | 2,77  | 4,5E-01 | 1,37 |
| PPIB_HUMAN  | Peptidyl-prolyl cis-trans isomerase B                    | 23 | 1,8E-02 | 1,91  | 2,3E-01 | 1,36 |
| ELAV1_HUMAN | ELAV-like protein 1                                      | 15 | 2,3E-02 | 2,77  | 4,8E-01 | 1,35 |
| EXOS5_HUMAN | Exosome complex component RRP46                          | 5  | 2,8E-02 | 3,70  | 5,3E-01 | 1,34 |
| H2A1C_HUMAN | Histone H2A type 1-C                                     | 2  | 2,5E-02 | 0,04  | 8,3E-01 | 1,34 |
| MBNL1_HUMAN | Muscleblind-like protein 1                               | 5  | 3,1E-02 | 4,07  | 6,9E-01 | 1,33 |
| ATP9A_HUMAN | Probable phospholipid-transporting ATPase IIA            | 2  | 2,3E-02 | 3,61  | 3,6E-01 | 1,32 |
| USP9X_HUMAN | Probable ubiquitin carboxyl-terminal hydrolase FAF-X     | 13 | 4,5E-02 | 2,39  | 1,5E-01 | 1,32 |
| GID8_HUMAN  | Glucose-induced degradation protein 8 homolog            | 2  | 3,8E-05 | 11,50 | 7,1E-01 | 1,32 |
| TM165_HUMAN | Transmembrane protein 165                                | 2  | 3,3E-02 | 1,66  | 7,8E-01 | 1,31 |
| NXP20_HUMAN | Protein NOXP20                                           | 3  | 7,1E-03 | 2,92  | 7,9E-01 | 1,30 |
| PCY2_HUMAN  | Ethanolamine-phosphate cytidyltransferase                | 4  | 6,6E-03 | 8,09  | 7,7E-01 | 1,29 |
| ERAP1_HUMAN | Endoplasmic reticulum aminopeptidase 1                   | 17 | 2,6E-03 | 9,42  | 6,7E-01 | 1,27 |
| CPPED_HUMAN | Serine/threonine-protein phosphatase CPPED1              | 6  | 2,5E-02 | 0,16  | 7,7E-01 | 1,26 |
| PSMD5_HUMAN | 26S proteasome non-ATPase regulatory subunit 5           | 6  | 4,5E-02 | 4,25  | 7,1E-01 | 1,25 |
| MCU_HUMAN   | Calcium uniporter protein mitochondrial                  | 2  | 6,6E-03 | 4,57  | 7,2E-01 | 1,24 |
| FA98A_HUMAN | Protein FAM98A                                           | 2  | 4,2E-02 | 4,63  | 5,8E-01 | 1,24 |
| GRHPR_HUMAN | Glyoxylate reductase/hydroxypyruvate reductase           | 12 | 2,3E-02 | 2,17  | 6,7E-01 | 1,24 |
| PSIP1_HUMAN | PC4 and SFRS1-interacting protein                        | 2  | 1,4E-02 | 2,45  | 7,5E-01 | 1,23 |
| PFD5_HUMAN  | Prefoldin subunit 5                                      | 3  | 4,4E-02 | 0,20  | 8,2E-01 | 1,22 |
| LGUL_HUMAN  | Lactoylglutathione lyase                                 | 20 | 3,8E-02 | 2,87  | 7,1E-01 | 1,21 |
| RL11_HUMAN  | 60S ribosomal protein L11                                | 12 | 3,6E-02 | 2,55  | 5,8E-01 | 1,20 |
| GCP2_HUMAN  | Gamma-tubulin complex component 2                        | 3  | 2,7E-02 | 8,42  | 8,4E-01 | 1,19 |
| AP2A2_HUMAN | AP-2 complex subunit alpha-2                             | 13 | 8,2E-03 | 3,00  | 7,7E-01 | 1,19 |

|             |                                                                               |    |         |       |         |      |
|-------------|-------------------------------------------------------------------------------|----|---------|-------|---------|------|
| PGAM1_HUMAN | Phosphoglycerate mutase 1                                                     | 22 | 7,4E-03 | 2,25  | 6,6E-01 | 1,18 |
| NEK7_HUMAN  | Serine/threonine-protein kinase Nek7                                          | 2  | 3,1E-03 | 7,00  | 7,5E-01 | 1,17 |
| HNRPL_HUMAN | Heterogeneous nuclear ribonucleoprotein L                                     | 28 | 6,7E-03 | 2,64  | 7,7E-01 | 1,17 |
| RU2A_HUMAN  | U2 small nuclear ribonucleoprotein A'                                         | 12 | 3,8E-02 | 1,70  | 7,7E-01 | 1,17 |
| PANX1_HUMAN | Pannexin-1                                                                    | 3  | 4,0E-02 | 6,94  | 6,9E-01 | 1,17 |
| TPC12_HUMAN | Trafficking protein particle complex subunit 12                               | 2  | 3,8E-02 | 3,60  | 7,8E-01 | 1,17 |
| PRKRA_HUMAN | Interferon-inducible double-stranded RNA-dependent protein kinase activator A | 4  | 1,5E-02 | 6,53  | 9,0E-01 | 1,16 |
| RPN2_HUMAN  | Dolichyl-diphosphooligosaccharide--protein glycosyltransferase subunit 2      | 27 | 9,5E-04 | 5,20  | 8,3E-01 | 1,15 |
| H4_HUMAN    | Histone H4                                                                    | 18 | 2,4E-02 | 0,41  | 7,4E-01 | 1,15 |
| SCAM2_HUMAN | Secretory carrier-associated membrane protein 2                               | 4  | 2,1E-03 | 1,57  | 5,2E-01 | 1,13 |
| MEAK7_HUMAN | MTOR-associated protein MEAK7                                                 | 2  | 2,0E-02 | 4,91  | 9,0E-01 | 1,13 |
| BABA2_HUMAN | BRISC and BRCA1-A complex member 2                                            | 6  | 4,0E-02 | 4,67  | 8,9E-01 | 1,13 |
| ATG5_HUMAN  | Autophagy protein 5                                                           | 3  | 2,6E-02 | 3,35  | 8,3E-01 | 1,13 |
| PIGS_HUMAN  | GPI transamidase component PIG-S                                              | 7  | 3,9E-03 | 8,18  | 8,3E-01 | 1,12 |
| PSA5_HUMAN  | Proteasome subunit alpha type-5                                               | 13 | 2,6E-02 | 1,74  | 7,9E-01 | 1,12 |
| ATPA_HUMAN  | ATP synthase subunit alpha mitochondrial                                      | 40 | 4,3E-02 | 2,51  | 7,8E-01 | 1,12 |
| PSB3_HUMAN  | Proteasome subunit beta type-3                                                | 11 | 2,4E-02 | 2,24  | 7,1E-01 | 1,11 |
| MPPB_HUMAN  | Mitochondrial-processing peptidase subunit beta                               | 13 | 3,9E-02 | 3,90  | 9,1E-01 | 1,11 |
| CD14_HUMAN  | Monocyte differentiation antigen CD14                                         | 4  | 1,4E-02 | 10,31 | 8,6E-01 | 1,11 |
| IN35_HUMAN  | Interferon-induced 35 kDa protein                                             | 2  | 2,5E-02 | 4,32  | 9,0E-01 | 1,11 |
| ARPC2_HUMAN | Actin-related protein 2/3 complex subunit 2                                   | 30 | 3,0E-02 | 2,78  | 8,2E-01 | 1,10 |
| LRC40_HUMAN | Leucine-rich repeat-containing protein 40                                     | 2  | 2,3E-02 | 8,10  | 8,9E-01 | 1,10 |
| VP33B_HUMAN | Vacuolar protein sorting-associated protein 33B                               | 5  | 7,6E-03 | 4,98  | 9,1E-01 | 1,09 |
| S10A4_HUMAN | Protein S100-A4                                                               | 6  | 1,0E-02 | 4,03  | 9,1E-01 | 1,08 |
| DUS3L_HUMAN | tRNA-dihydrouridine(47) synthase [NAD(P)(+)]-like                             | 9  | 5,0E-02 | 8,46  | 9,4E-01 | 1,07 |
| MAPK3_HUMAN | MAP kinase-activated protein kinase 3                                         | 2  | 2,1E-02 | 2,71  | 9,3E-01 | 1,06 |
| G6PI_HUMAN  | Glucose-6-phosphate isomerase                                                 | 23 | 1,2E-02 | 2,13  | 7,7E-01 | 1,06 |

|             |                                                                       |    |         |      |         |      |
|-------------|-----------------------------------------------------------------------|----|---------|------|---------|------|
| DAB2_HUMAN  | Disabled homolog 2                                                    | 7  | 1,9E-02 | 3,88 | 8,4E-01 | 1,05 |
| GSTO1_HUMAN | Glutathione S-transferase omega-1                                     | 20 | 1,3E-02 | 2,53 | 9,3E-01 | 1,03 |
| SDCB1_HUMAN | Syntenin-1                                                            | 10 | 2,0E-02 | 3,41 | 9,6E-01 | 1,03 |
| ETF_A_HUMAN | Electron transfer flavoprotein subunit alpha mitochondrial            | 17 | 3,0E-02 | 2,18 | 9,1E-01 | 1,03 |
| EF1A1_HUMAN | Elongation factor 1-alpha 1                                           | 19 | 3,8E-02 | 3,41 | 9,7E-01 | 1,02 |
| IFT25_HUMAN | Intraflagellar transport protein 25 homolog                           | 3  | 4,1E-02 | 9,40 | 9,8E-01 | 1,02 |
| THADA_HUMAN | Thyroid adenoma-associated protein                                    | 2  | 2,3E-02 | 2,50 | 9,7E-01 | 1,02 |
| LANC1_HUMAN | Glutathione S-transferase LANCL1                                      | 2  | 4,0E-02 | 3,90 | 9,7E-01 | 1,01 |
| MPI_HUMAN   | Mannose-6-phosphate isomerase                                         | 5  | 2,6E-02 | 4,66 | 9,9E-01 | 1,00 |
| TBCE_HUMAN  | Tubulin-specific chaperone E                                          | 6  | 1,9E-02 | 2,30 | 9,9E-01 | 1,00 |
| CC88B_HUMAN | Coiled-coil domain-containing protein 88B                             | 3  | 7,7E-03 | 0,14 | 1,0E+00 | 1,00 |
| RS2_HUMAN   | 40S ribosomal protein S2                                              | 13 | 3,1E-02 | 3,06 | 1,0E+00 | 1,00 |
| T2FB_HUMAN  | General transcription factor IIF subunit 2                            | 3  | 4,1E-02 | 0,18 | 1,0E+00 | 1,00 |
| AT2C1_HUMAN | Calcium-transporting ATPase type 2C member 1                          | 2  | 7,4E-03 | 0,46 | 9,9E-01 | 0,99 |
| TETN_HUMAN  | Tetranectin                                                           | 7  | 1,6E-02 | 3,43 | 9,8E-01 | 0,98 |
| RFC5_HUMAN  | Replication factor C subunit 5                                        | 3  | 1,8E-02 | 7,03 | 9,5E-01 | 0,98 |
| ZC3HF_HUMAN | Zinc finger CCCH domain-containing protein 15                         | 2  | 3,7E-02 | 0,42 | 9,7E-01 | 0,98 |
| COR1C_HUMAN | Coronin-1C                                                            | 19 | 2,1E-02 | 2,43 | 9,5E-01 | 0,98 |
| UBA1_HUMAN  | Ubiquitin-like modifier-activating enzyme 1                           | 45 | 4,4E-02 | 2,20 | 9,4E-01 | 0,98 |
| DOP2_HUMAN  | Protein dopey-2                                                       | 5  | 2,3E-02 | 2,86 | 9,4E-01 | 0,97 |
| ATPD_HUMAN  | ATP synthase subunit delta mitochondrial                              | 3  | 2,2E-02 | 3,29 | 9,8E-01 | 0,97 |
| TOIP2_HUMAN | Torsin-1A-interacting protein 2                                       | 3  | 2,3E-02 | 3,39 | 9,8E-01 | 0,97 |
| IPO7_HUMAN  | Importin-7                                                            | 27 | 4,2E-02 | 2,80 | 9,4E-01 | 0,97 |
| NOMO2_HUMAN | Nodal modulator 2                                                     | 34 | 6,6E-04 | 4,06 | 9,5E-01 | 0,96 |
| AIMP2_HUMAN | Aminoacyl tRNA synthase complex-interacting multifunctional protein 2 | 6  | 2,9E-03 | 2,41 | 9,4E-01 | 0,96 |
| ENPL_HUMAN  | Endoplasmic reticulum protein                                         | 73 | 4,6E-02 | 2,03 | 8,9E-01 | 0,95 |
| COPG1_HUMAN | Coatomer subunit gamma-1                                              | 30 | 4,9E-02 | 2,67 | 9,2E-01 | 0,95 |
| TB182_HUMAN | 182 kDa tankyrase-1-binding protein                                   | 11 | 1,9E-02 | 0,29 | 8,5E-01 | 0,95 |

|             |                                                                        |    |         |       |         |      |
|-------------|------------------------------------------------------------------------|----|---------|-------|---------|------|
| H2A2C_HUMAN | Histone H2A type 2-C                                                   | 3  | 1,9E-02 | 0,09  | 9,1E-01 | 0,94 |
| EIF3A_HUMAN | Eukaryotic translation initiation factor 3 subunit A                   | 37 | 2,6E-02 | 2,44  | 8,7E-01 | 0,93 |
| MSTO1_HUMAN | Protein misato homolog 1                                               | 2  | 2,3E-02 | 3,58  | 8,7E-01 | 0,93 |
| P3H2_HUMAN  | Prolyl 3-hydroxylase 2                                                 | 2  | 1,5E-02 | 1,84  | 8,3E-01 | 0,92 |
| NIP7_HUMAN  | 60S ribosome subunit biogenesis protein NIP7 homolog                   | 2  | 3,1E-02 | 2,53  | 8,9E-01 | 0,90 |
| DAZP1_HUMAN | DAZ-associated protein 1                                               | 9  | 3,7E-02 | 2,15  | 8,4E-01 | 0,90 |
| CFAI_HUMAN  | Complement factor I                                                    | 2  | 1,7E-02 | 11,59 | 9,2E-01 | 0,90 |
| MGST2_HUMAN | Microsomal glutathione S-transferase 2                                 | 2  | 7,9E-04 | 12,40 | 9,0E-01 | 0,90 |
| HGH1_HUMAN  | Protein HGH1 homolog                                                   | 5  | 4,8E-02 | 3,86  | 9,0E-01 | 0,90 |
| CAN1_HUMAN  | Calpain-1 catalytic subunit                                            | 18 | 1,4E-02 | 2,19  | 7,3E-01 | 0,89 |
| MGAT1_HUMAN | Alpha-1 3-mannosyl-glycoprotein 2-beta-N-acetylglucosaminyltransferase | 2  | 1,5E-02 | 2,97  | 8,1E-01 | 0,89 |
| SYAC_HUMAN  | Alanine--tRNA ligase cytoplasmic                                       | 36 | 4,4E-02 | 3,17  | 7,9E-01 | 0,88 |
| DC1L2_HUMAN | Cytoplasmic dynein 1 light intermediate chain 2                        | 3  | 7,6E-03 | 15,95 | 8,9E-01 | 0,87 |
| E2AK2_HUMAN | Interferon-induced double-stranded RNA-activated protein kinase        | 5  | 4,4E-02 | 4,48  | 8,2E-01 | 0,87 |
| PPID_HUMAN  | Peptidyl-prolyl cis-trans isomerase D                                  | 5  | 2,3E-02 | 2,16  | 6,1E-01 | 0,87 |
| DPP2_HUMAN  | Dipeptidyl peptidase 2                                                 | 14 | 8,2E-03 | 3,85  | 7,5E-01 | 0,85 |
| PIMT_HUMAN  | Protein-L-isoaspartate(D-aspartate) O-methyltransferase                | 9  | 3,9E-03 | 10,23 | 7,8E-01 | 0,85 |
| RHG27_HUMAN | Rho GTPase-activating protein 27                                       | 2  | 1,9E-02 | 2,06  | 8,1E-01 | 0,85 |
| GCN1_HUMAN  | eIF-2-alpha kinase activator GCN1                                      | 26 | 2,5E-02 | 3,04  | 7,3E-01 | 0,85 |
| HYOU1_HUMAN | Hypoxia up-regulated protein 1                                         | 54 | 3,9E-02 | 0,52  | 7,2E-01 | 0,84 |
| AT1B3_HUMAN | Sodium/potassium-transporting ATPase subunit beta-3                    | 8  | 1,5E-02 | 2,94  | 7,1E-01 | 0,84 |
| CATG_HUMAN  | Cathepsin G                                                            | 17 | 1,9E-02 | 2,09  | 7,0E-01 | 0,83 |
| TMM33_HUMAN | Transmembrane protein 33                                               | 5  | 5,0E-03 | 13,51 | 8,4E-01 | 0,83 |
| FA5_HUMAN   | Coagulation factor V                                                   | 8  | 3,5E-02 | 0,16  | 8,3E-01 | 0,83 |
| FLOT2_HUMAN | Flotillin-2                                                            | 4  | 2,7E-02 | 4,55  | 8,2E-01 | 0,83 |
| ORNT1_HUMAN | Mitochondrial ornithine transporter 1                                  | 2  | 3,2E-02 | 5,65  | 7,9E-01 | 0,81 |
| RS12_HUMAN  | 40S ribosomal protein S12                                              | 10 | 3,4E-02 | 3,03  | 6,6E-01 | 0,81 |
| HXK2_HUMAN  | Hexokinase-2                                                           | 19 | 2,8E-02 | 6,51  | 7,0E-01 | 0,81 |

|             |                                                             |    |         |       |         |      |
|-------------|-------------------------------------------------------------|----|---------|-------|---------|------|
| TM10C_HUMAN | tRNA methyltransferase 10 homolog C                         | 2  | 4,8E-05 | 13,06 | 8,2E-01 | 0,81 |
| GLYM_HUMAN  | Serine hydroxymethyltransferase mitochondrial               | 27 | 1,9E-02 | 4,99  | 7,4E-01 | 0,81 |
| LACB2_HUMAN | Endoribonuclease LACTB2                                     | 8  | 2,4E-02 | 1,99  | 6,6E-01 | 0,81 |
| TECR_HUMAN  | Very-long-chain enoyl-CoA reductase                         | 13 | 1,7E-02 | 5,02  | 7,2E-01 | 0,79 |
| WDR1_HUMAN  | WD repeat-containing protein 1                              | 42 | 4,2E-02 | 2,63  | 5,2E-01 | 0,79 |
| UBP24_HUMAN | Ubiquitin carboxyl-terminal hydrolase 24                    | 3  | 2,4E-02 | 2,18  | 4,4E-01 | 0,78 |
| THOC6_HUMAN | THO complex subunit 6 homolog                               | 4  | 3,0E-02 | 3,51  | 7,3E-01 | 0,78 |
| IF4E_HUMAN  | Eukaryotic translation initiation factor 4E                 | 8  | 2,9E-02 | 0,42  | 5,1E-01 | 0,78 |
| FSCN1_HUMAN | Fascin                                                      | 39 | 1,0E-02 | 1,52  | 2,7E-01 | 0,78 |
| CY24B_HUMAN | Cytochrome b-245 heavy chain                                | 5  | 3,8E-02 | 3,24  | 7,4E-01 | 0,78 |
| MCCA_HUMAN  | Methylcrotonoyl-CoA carboxylase subunit alpha mitochondrial | 5  | 7,1E-03 | 12,35 | 6,5E-01 | 0,77 |
| NNRE_HUMAN  | NAD(P)H-hydrate epimerase                                   | 9  | 2,9E-02 | 6,75  | 7,3E-01 | 0,77 |
| BST1_HUMAN  | ADP-ribosyl cyclase/cyclic ADP-ribose hydrolase 2           | 12 | 1,5E-02 | 4,05  | 7,6E-01 | 0,76 |
| EF1G_HUMAN  | Elongation factor 1-gamma                                   | 24 | 2,4E-02 | 2,42  | 1,5E-01 | 0,76 |
| 5NTD_HUMAN  | 5'-nucleotidase                                             | 13 | 2,8E-02 | 8,84  | 5,1E-01 | 0,76 |
| ERO1A_HUMAN | ERO1-like protein alpha                                     | 11 | 2,0E-02 | 7,53  | 7,5E-01 | 0,76 |
| DHRS4_HUMAN | Dehydrogenase/reductase SDR family member 4                 | 2  | 4,4E-02 | 1,67  | 3,6E-01 | 0,75 |
| DNJC9_HUMAN | DnaJ homolog subfamily C member 9                           | 3  | 2,0E-03 | 2,73  | 7,0E-01 | 0,75 |
| LETM1_HUMAN | Mitochondrial proton/calcium exchanger protein              | 14 | 8,0E-03 | 0,34  | 5,3E-01 | 0,75 |
| MBB1A_HUMAN | Myb-binding protein 1A                                      | 2  | 1,6E-02 | 4,92  | 7,4E-01 | 0,75 |
| GELS_HUMAN  | Gelsolin                                                    | 55 | 3,7E-02 | 2,46  | 6,1E-01 | 0,74 |
| FAN_HUMAN   | Protein FAN                                                 | 3  | 2,1E-02 | 5,60  | 6,9E-01 | 0,74 |
| PSA3_HUMAN  | Proteasome subunit alpha type-3                             | 13 | 2,1E-02 | 0,44  | 5,2E-01 | 0,74 |
| STX5_HUMAN  | Syntaxin-5                                                  | 2  | 1,9E-02 | 5,12  | 6,5E-01 | 0,74 |
| ARPC3_HUMAN | Actin-related protein 2/3 complex subunit 3                 | 12 | 4,0E-02 | 2,51  | 3,9E-01 | 0,74 |
| SF3B6_HUMAN | Splicing factor 3B subunit 6                                | 4  | 2,9E-02 | 0,37  | 2,6E-01 | 0,74 |
| LRC59_HUMAN | Leucine-rich repeat-containing protein 59                   | 14 | 5,4E-03 | 2,46  | 5,5E-01 | 0,73 |
| GOSR1_HUMAN | Golgi SNAP receptor complex member 1                        | 2  | 4,3E-02 | 5,47  | 6,7E-01 | 0,73 |



|             |                                                                   |    |         |       |         |      |
|-------------|-------------------------------------------------------------------|----|---------|-------|---------|------|
| RHG17_HUMAN | Rho GTPase-activating protein 17                                  | 10 | 9,6E-03 | 7,04  | 7,4E-01 | 0,72 |
| RAD21_HUMAN | Double-strand-break repair protein rad21 homolog                  | 6  | 1,7E-02 | 1,92  | 5,3E-01 | 0,72 |
| ST1A1_HUMAN | Sulfotransferase 1A1                                              | 6  | 4,7E-02 | 3,18  | 3,5E-01 | 0,72 |
| PPIF_HUMAN  | Peptidyl-prolyl cis-trans isomerase F mitochondrial               | 11 | 4,2E-03 | 0,37  | 2,6E-01 | 0,72 |
| KPYM_HUMAN  | Pyruvate kinase PKM                                               | 56 | 3,8E-02 | 1,69  | 2,3E-01 | 0,71 |
| HSP74_HUMAN | Heat shock 70 kDa protein 4                                       | 49 | 3,7E-02 | 0,64  | 1,6E-01 | 0,71 |
| HNRPK_HUMAN | Heterogeneous nuclear ribonucleoprotein K                         | 31 | 4,2E-02 | 3,91  | 6,4E-01 | 0,71 |
| CAH2_HUMAN  | Carbonic anhydrase 2                                              | 30 | 6,9E-03 | 2,45  | 3,8E-01 | 0,70 |
| MEP50_HUMAN | Methylosome protein 50                                            | 6  | 1,1E-02 | 4,56  | 6,0E-01 | 0,70 |
| FCL_HUMAN   | GDP-L-fucose synthase                                             | 7  | 2,5E-02 | 3,50  | 1,8E-01 | 0,68 |
| FAM3C_HUMAN | Protein FAM3C                                                     | 5  | 1,1E-02 | 3,49  | 3,1E-01 | 0,68 |
| IF4E2_HUMAN | Eukaryotic translation initiation factor 4E type 2                | 2  | 3,7E-02 | 2,20  | 2,4E-01 | 0,68 |
| COMP_HUMAN  | Cartilage oligomeric matrix protein                               | 7  | 2,3E-02 | 0,19  | 6,4E-01 | 0,67 |
| EF1D_HUMAN  | Elongation factor 1-delta                                         | 14 | 2,2E-01 | 0,20  | 1,5E-02 | 0,66 |
| MYLK_HUMAN  | Myosin light chain kinase smooth muscle                           | 3  | 4,2E-02 | 6,25  | 5,2E-01 | 0,65 |
| IF4G3_HUMAN | Eukaryotic translation initiation factor 4 gamma 3                | 3  | 3,3E-02 | 4,26  | 5,0E-01 | 0,65 |
| DPOD2_HUMAN | DNA polymerase delta subunit 2                                    | 3  | 1,7E-02 | 3,88  | 7,2E-01 | 0,65 |
| PRS7_HUMAN  | 26S proteasome regulatory subunit 7                               | 21 | 1,3E-02 | 0,35  | 7,2E-01 | 0,65 |
| AT2B4_HUMAN | Plasma membrane calcium-transporting ATPase 4                     | 7  | 9,5E-01 | 1,06  | 2,9E-02 | 0,65 |
| CELF1_HUMAN | CUGBP Elav-like family member 1                                   | 4  | 3,6E-02 | 0,43  | 3,9E-01 | 0,64 |
| RPAP3_HUMAN | RNA polymerase II-associated protein 3                            | 3  | 3,3E-02 | 4,23  | 5,2E-01 | 0,64 |
| NUCKS_HUMAN | Nuclear ubiquitous casein and cyclin-dependent kinase substrate 1 | 5  | 2,1E-02 | 0,14  | 6,1E-01 | 0,64 |
| TT39B_HUMAN | Tetratricopeptide repeat protein 39B                              | 4  | 1,1E-02 | 10,13 | 6,2E-01 | 0,63 |
| NAA50_HUMAN | N-alpha-acetyltransferase 50                                      | 10 | 3,8E-02 | 0,13  | 2,5E-01 | 0,63 |
| TGO1_HUMAN  | Transport and Golgi organization protein 1 homolog                | 3  | 4,6E-01 | 0,53  | 3,3E-02 | 0,63 |
| TRAM1_HUMAN | Translocating chain-associated membrane protein 1                 | 2  | 3,3E-02 | 3,92  | 6,1E-01 | 0,63 |
| C1TM_HUMAN  | Monofunctional C1-tetrahydrofolate synthase mitochondrial         | 5  | 3,7E-02 | 3,30  | 5,1E-01 | 0,63 |
| NDUS1_HUMAN | NADH-ubiquinone oxidoreductase 75 kDa subunit mitochondrial       | 15 | 3,6E-02 | 10,74 | 3,8E-01 | 0,63 |

|             |                                                              |    |         |      |         |      |
|-------------|--------------------------------------------------------------|----|---------|------|---------|------|
| COMT_HUMAN  | Catechol O-methyltransferase                                 | 24 | 4,9E-02 | 1,99 | 7,6E-02 | 0,62 |
| TCPB_HUMAN  | T-complex protein 1 subunit beta                             | 43 | 8,3E-03 | 1,72 | 2,1E-01 | 0,62 |
| DPYD_HUMAN  | Dihydropyrimidine dehydrogenase [NADP(+)]                    | 3  | 1,7E-02 | 3,01 | 1,0E-01 | 0,62 |
| SPN90_HUMAN | NCK-interacting protein with SH3 domain                      | 6  | 5,7E-02 | 0,29 | 2,9E-02 | 0,61 |
| H2AY_HUMAN  | Core histone macro-H2A.1                                     | 15 | 7,3E-01 | 0,87 | 4,6E-02 | 0,61 |
| ATPG_HUMAN  | ATP synthase subunit gamma mitochondrial                     | 9  | 1,3E-03 | 2,22 | 3,2E-01 | 0,61 |
| HMG1_HUMAN  | Non-histone chromosomal protein HMG-14                       | 3  | 1,2E-03 | 0,11 | 7,1E-02 | 0,60 |
| FINC_HUMAN  | Fibronectin                                                  | 44 | 2,1E-03 | 6,93 | 5,8E-01 | 0,59 |
| DNJA2_HUMAN | DnaJ homolog subfamily A member 2                            | 7  | 6,6E-01 | 0,71 | 3,1E-02 | 0,59 |
| RL31_HUMAN  | 60S ribosomal protein L31                                    | 4  | 1,4E-02 | 7,96 | 5,4E-01 | 0,59 |
| STK10_HUMAN | Serine/threonine-protein kinase 10                           | 31 | 8,1E-01 | 1,10 | 2,9E-02 | 0,59 |
| CSTOS_HUMAN | Protein CUSTOS                                               | 2  | 7,8E-03 | 0,25 | 2,7E-01 | 0,59 |
| ACTN4_HUMAN | Alpha-actinin-4                                              | 41 | 4,2E-02 | 5,09 | 6,0E-01 | 0,58 |
| DHB12_HUMAN | Very-long-chain 3-oxoacyl-CoA reductase                      | 10 | 4,6E-01 | 0,73 | 3,4E-02 | 0,58 |
| PAIRB_HUMAN | Plasminogen activator inhibitor 1 RNA-binding protein        | 18 | 8,0E-01 | 0,82 | 3,9E-02 | 0,58 |
| AP1B1_HUMAN | AP-1 complex subunit beta-1                                  | 13 | 2,0E-02 | 0,32 | 2,7E-01 | 0,57 |
| CO5_HUMAN   | Complement C5                                                | 3  | 4,5E-02 | 5,73 | 3,6E-01 | 0,57 |
| RTCA_HUMAN  | RNA 3'-terminal phosphate cyclase                            | 10 | 3,8E-02 | 4,97 | 6,0E-01 | 0,57 |
| CLPB_HUMAN  | Caseinolytic peptidase B protein homolog                     | 7  | 3,0E-02 | 4,78 | 5,5E-01 | 0,57 |
| PHB_HUMAN   | Prohibitin                                                   | 12 | 9,8E-01 | 1,01 | 4,3E-02 | 0,57 |
| ISG15_HUMAN | Ubiquitin-like protein ISG15                                 | 3  | 4,7E-02 | 5,97 | 5,9E-01 | 0,57 |
| NT5D2_HUMAN | 5'-nucleotidase domain-containing protein 2                  | 9  | 5,7E-01 | 0,70 | 8,4E-04 | 0,56 |
| AP2S1_HUMAN | AP-2 complex subunit sigma                                   | 4  | 4,5E-02 | 7,65 | 4,2E-01 | 0,56 |
| BCAR1_HUMAN | Breast cancer anti-estrogen resistance protein 1             | 2  | 1,4E-02 | 3,47 | 3,3E-01 | 0,56 |
| PGRC1_HUMAN | Membrane-associated progesterone receptor component 1        | 4  | 9,9E-03 | 2,45 | 6,9E-02 | 0,56 |
| NIPA_HUMAN  | Nuclear-interacting partner of ALK                           | 2  | 4,1E-02 | 3,64 | 2,1E-01 | 0,56 |
| RL30_HUMAN  | 60S ribosomal protein L30                                    | 6  | 8,6E-03 | 1,80 | 4,0E-01 | 0,56 |
| COA3_HUMAN  | Cytochrome c oxidase assembly factor 3 homolog mitochondrial | 2  | 6,0E-01 | 0,79 | 4,6E-02 | 0,55 |

|             |                                                                                  |    |         |      |         |      |
|-------------|----------------------------------------------------------------------------------|----|---------|------|---------|------|
| EH1L1_HUMAN | EH domain-binding protein 1-like protein 1                                       | 2  | 4,4E-02 | 0,52 | 3,0E-01 | 0,54 |
| IF2A_HUMAN  | Eukaryotic translation initiation factor 2 subunit 1                             | 26 | 7,5E-01 | 0,86 | 3,2E-02 | 0,54 |
| VP26C_HUMAN | Vacuolar protein sorting-associated protein 26C                                  | 2  | 3,0E-02 | 3,04 | 2,9E-01 | 0,54 |
| YIF1A_HUMAN | Protein YIF1A                                                                    | 2  | 3,1E-02 | 5,80 | 4,2E-01 | 0,54 |
| SIL1_HUMAN  | Nucleotide exchange factor SIL1                                                  | 5  | 5,0E-02 | 4,08 | 3,4E-01 | 0,54 |
| PRP31_HUMAN | U4/U6 small nuclear ribonucleoprotein Prp31                                      | 5  | 4,4E-02 | 0,20 | 4,5E-01 | 0,53 |
| RNH2B_HUMAN | Ribonuclease H2 subunit B                                                        | 2  | 1,2E-01 | 2,85 | 4,9E-02 | 0,52 |
| DCTN4_HUMAN | Dynactin subunit 4                                                               | 2  | 4,6E-02 | 3,40 | 2,1E-01 | 0,52 |
| PML_HUMAN   | Protein PML                                                                      | 7  | 7,5E-01 | 0,76 | 1,9E-02 | 0,52 |
| TCTP_HUMAN  | Translationally-controlled tumor protein                                         | 10 | 5,6E-01 | 1,44 | 3,7E-02 | 0,51 |
| FLNB_HUMAN  | Filamin-B                                                                        | 11 | 4,7E-01 | 1,24 | 4,9E-02 | 0,50 |
| DPP3_HUMAN  | Dipeptidyl peptidase 3                                                           | 23 | 3,7E-01 | 0,30 | 4,5E-02 | 0,50 |
| NIBA1_HUMAN | Protein Niban 1                                                                  | 10 | 3,9E-01 | 1,60 | 4,5E-02 | 0,50 |
| PCY1A_HUMAN | Choline-phosphate cytidyltransferase A                                           | 8  | 4,2E-01 | 0,55 | 3,7E-02 | 0,50 |
| PPCE_HUMAN  | Prolyl endopeptidase                                                             | 33 | 1,4E-01 | 2,80 | 3,7E-02 | 0,50 |
| IMA3_HUMAN  | Importin subunit alpha-3                                                         | 9  | 3,2E-02 | 7,74 | 5,3E-01 | 0,50 |
| PLXB2_HUMAN | Plexin-B2                                                                        | 23 | 3,7E-02 | 0,24 | 3,5E-01 | 0,50 |
| ENOF1_HUMAN | Mitochondrial enolase superfamily member 1                                       | 2  | 2,0E-02 | 6,19 | 3,1E-01 | 0,49 |
| RIC8A_HUMAN | Synembryn-A                                                                      | 5  | 5,1E-01 | 1,59 | 4,4E-02 | 0,49 |
| ACPH_HUMAN  | Acylamino-acid-releasing enzyme                                                  | 13 | 3,0E-01 | 2,51 | 2,7E-02 | 0,48 |
| HMCS1_HUMAN | Hydroxymethylglutaryl-CoA synthase cytoplasmic                                   | 9  | 3,5E-02 | 2,18 | 3,5E-01 | 0,48 |
| OGT1_HUMAN  | UDP-N-acetylglucosamine--peptide N-acetylglucosaminyltransferase 110 kDa subunit | 14 | 3,2E-02 | 2,62 | 4,4E-01 | 0,48 |
| HS2ST_HUMAN | Heparan sulfate 2-O-sulfotransferase 1                                           | 6  | 9,8E-01 | 1,03 | 4,2E-02 | 0,47 |
| RTN4_HUMAN  | Reticulon-4                                                                      | 8  | 2,4E-02 | 2,28 | 2,9E-01 | 0,47 |
| SYTC_HUMAN  | Threonine--tRNA ligase 1 cytoplasmic                                             | 30 | 1,2E-02 | 3,21 | 4,0E-01 | 0,47 |
| KSYK_HUMAN  | Tyrosine-protein kinase SYK                                                      | 14 | 2,7E-01 | 1,51 | 1,6E-02 | 0,47 |
| S39AE_HUMAN | Metal cation symporter ZIP14                                                     | 3  | 2,0E-01 | 0,41 | 2,7E-02 | 0,47 |

|             |                                                     |    |         |       |         |      |
|-------------|-----------------------------------------------------|----|---------|-------|---------|------|
| CAR19_HUMAN | Caspase recruitment domain-containing protein 19    | 2  | 4,9E-02 | 2,52  | 2,3E-01 | 0,47 |
| MDHC_HUMAN  | Malate dehydrogenase cytoplasmic                    | 21 | 4,6E-02 | 2,45  | 2,8E-01 | 0,46 |
| ICAM1_HUMAN | Intercellular adhesion molecule 1                   | 9  | 2,9E-01 | 0,35  | 2,9E-02 | 0,46 |
| MOES_HUMAN  | Moesin                                              | 44 | 7,3E-01 | 0,85  | 2,7E-02 | 0,46 |
| HNRPD_HUMAN | Heterogeneous nuclear ribonucleoprotein D0          | 22 | 1,5E-02 | 2,58  | 3,3E-01 | 0,46 |
| S4A7_HUMAN  | Sodium bicarbonate cotransporter 3                  | 17 | 5,9E-01 | 2,02  | 3,8E-02 | 0,45 |
| SAM50_HUMAN | Sorting and assembly machinery component 50 homolog | 12 | 4,8E-01 | 1,32  | 2,6E-02 | 0,45 |
| ITPA_HUMAN  | Inosine triphosphate pyrophosphatase                | 3  | 3,3E-02 | 17,03 | 5,3E-01 | 0,45 |
| FL2D_HUMAN  | Pre-mRNA-splicing regulator WTAP                    | 4  | 4,6E-02 | 0,28  | 1,9E-01 | 0,44 |
| CPNS1_HUMAN | Calpain small subunit 1                             | 18 | 7,2E-01 | 1,42  | 8,6E-03 | 0,44 |
| OAT_HUMAN   | Ornithine aminotransferase mitochondrial            | 6  | 5,7E-01 | 1,27  | 2,7E-02 | 0,44 |
| ZN622_HUMAN | Zinc finger protein 622                             | 2  | 9,6E-01 | 1,02  | 3,2E-02 | 0,44 |
| CTNA1_HUMAN | Catenin alpha-1                                     | 4  | 1,5E-01 | 0,33  | 2,5E-02 | 0,44 |
| TKFC_HUMAN  | Triokinase/FMN cyclase                              | 8  | 4,3E-02 | 3,29  | 1,9E-01 | 0,44 |
| SRSF5_HUMAN | Serine/arginine-rich splicing factor 5              | 6  | 1,2E-03 | 0,07  | 2,7E-01 | 0,44 |
| SET_HUMAN   | Protein SET                                         | 16 | 9,9E-01 | 1,00  | 2,2E-02 | 0,43 |
| SRSF3_HUMAN | Serine/arginine-rich splicing factor 3              | 7  | 3,3E-03 | 0,26  | 1,7E-01 | 0,42 |
| GSK3A_HUMAN | Glycogen synthase kinase-3 alpha                    | 3  | 8,9E-01 | 0,93  | 2,1E-02 | 0,42 |
| SNX5_HUMAN  | Sorting nexin-5                                     | 9  | 5,5E-01 | 0,85  | 3,6E-02 | 0,42 |
| PCM1_HUMAN  | Pericentriolar material 1 protein                   | 34 | 2,1E-02 | 0,09  | 7,1E-02 | 0,41 |
| CND1_HUMAN  | Condensin complex subunit 1                         | 5  | 1,2E-02 | 8,41  | 2,7E-01 | 0,41 |
| RALB_HUMAN  | Ras-related protein Ral-B                           | 3  | 7,6E-01 | 1,25  | 1,7E-02 | 0,41 |
| HNRPC_HUMAN | Heterogeneous nuclear ribonucleoproteins C1/C2      | 10 | 5,4E-01 | 0,79  | 1,1E-02 | 0,41 |
| CSN7B_HUMAN | COP9 signalosome complex subunit 7b                 | 2  | 6,7E-01 | 1,28  | 1,5E-02 | 0,40 |
| CHP1_HUMAN  | Calcineurin B homologous protein 1                  | 5  | 5,0E-02 | 5,64  | 3,1E-01 | 0,40 |
| CNPY3_HUMAN | Protein canopy homolog 3                            | 9  | 3,3E-01 | 0,83  | 3,7E-02 | 0,40 |
| RFA2_HUMAN  | Replication protein A 32 kDa subunit                | 3  | 2,6E-01 | 3,05  | 2,9E-02 | 0,40 |
| BRE1A_HUMAN | E3 ubiquitin-protein ligase BRE1A                   | 2  | 8,0E-01 | 0,87  | 1,8E-02 | 0,39 |

|             |                                                                          |    |         |       |         |      |
|-------------|--------------------------------------------------------------------------|----|---------|-------|---------|------|
| H15_HUMAN   | Histone H1.5                                                             | 8  | 8,7E-01 | 1,04  | 5,0E-02 | 0,39 |
| PEF1_HUMAN  | Peflin                                                                   | 2  | 3,7E-02 | 2,93  | 3,2E-01 | 0,39 |
| GRN_HUMAN   | Progranulin                                                              | 2  | 5,0E-01 | 0,69  | 4,4E-02 | 0,39 |
| TGM2_HUMAN  | Protein-glutamine gamma-glutamyltransferase 2                            | 23 | 7,3E-01 | 0,77  | 5,5E-03 | 0,39 |
| NELFE_HUMAN | Negative elongation factor E                                             | 2  | 3,3E-01 | 0,49  | 4,5E-02 | 0,39 |
| BIN2_HUMAN  | Bridging integrator 2                                                    | 9  | 2,5E-02 | 10,18 | 3,3E-01 | 0,39 |
| WASP_HUMAN  | Wiskott-Aldrich syndrome protein                                         | 3  | 3,9E-01 | 1,84  | 3,9E-02 | 0,39 |
| PHAG1_HUMAN | Phosphoprotein associated with glycosphingolipid-enriched microdomains 1 | 2  | 1,7E-01 | 0,34  | 4,6E-02 | 0,39 |
| ARFG1_HUMAN | ADP-ribosylation factor GTPase-activating protein 1                      | 2  | 4,0E-01 | 0,57  | 4,5E-02 | 0,38 |
| T23O_HUMAN  | Tryptophan 2 3-dioxygenase                                               | 8  | 1,8E-01 | 0,36  | 4,7E-02 | 0,38 |
| NDKB_HUMAN  | Nucleoside diphosphate kinase B                                          | 5  | 2,2E-01 | 5,92  | 4,8E-02 | 0,37 |
| SUMF2_HUMAN | Inactive C-alpha-formylglycine-generating enzyme 2                       | 7  | 6,0E-01 | 1,55  | 5,5E-03 | 0,37 |
| IL1B_HUMAN  | Interleukin-1 beta                                                       | 14 | 5,9E-01 | 1,55  | 3,4E-02 | 0,37 |
| SRSF7_HUMAN | Serine/arginine-rich splicing factor 7                                   | 10 | 6,9E-01 | 1,38  | 1,2E-02 | 0,36 |
| NPM_HUMAN   | Nucleophosmin                                                            | 21 | 4,3E-02 | 0,47  | 2,0E-02 | 0,36 |
| KPCD_HUMAN  | Protein kinase C delta type                                              | 8  | 8,8E-01 | 0,97  | 3,3E-02 | 0,35 |
| DJC13_HUMAN | DnaJ homolog subfamily C member 13                                       | 3  | 5,4E-01 | 1,57  | 2,2E-02 | 0,35 |
| RRP8_HUMAN  | Ribosomal RNA-processing protein 8                                       | 2  | 9,3E-01 | 0,93  | 4,8E-02 | 0,35 |
| YTDC1_HUMAN | YTH domain-containing protein 1                                          | 2  | 1,1E-02 | 0,11  | 2,1E-01 | 0,35 |
| PDIA5_HUMAN | Protein disulfide-isomerase A5                                           | 4  | 4,2E-02 | 0,30  | 2,1E-01 | 0,34 |
| SLK_HUMAN   | STE20-like serine/threonine-protein kinase                               | 2  | 5,2E-01 | 0,70  | 2,1E-02 | 0,34 |
| RHG01_HUMAN | Rho GTPase-activating protein 1                                          | 19 | 3,7E-02 | 4,86  | 4,7E-01 | 0,33 |
| TMF1_HUMAN  | TATA element modulatory factor                                           | 2  | 8,4E-01 | 0,90  | 3,4E-03 | 0,32 |
| FKBP5_HUMAN | Peptidyl-prolyl cis-trans isomerase FKBP5                                | 12 | 7,4E-01 | 1,53  | 2,1E-02 | 0,32 |
| FIBG_HUMAN  | Fibrinogen gamma chain                                                   | 2  | 2,1E-02 | 4,91  | 5,6E-02 | 0,32 |
| LCP2_HUMAN  | Lymphocyte cytosolic protein 2                                           | 3  | 4,2E-02 | 0,34  | 1,5E-01 | 0,32 |
| FRIL_HUMAN  | Ferritin light chain                                                     | 3  | 1,9E-02 | 9,47  | 3,4E-01 | 0,32 |
| PRKDC_HUMAN | DNA-dependent protein kinase catalytic subunit                           | 53 | 4,9E-03 | 4,10  | 4,0E-01 | 0,31 |

|             |                                                                             |    |         |      |         |      |
|-------------|-----------------------------------------------------------------------------|----|---------|------|---------|------|
| MAK16_HUMAN | Protein MAK16 homolog                                                       | 5  | 2,9E-03 | 0,07 | 1,2E-01 | 0,31 |
| BABA1_HUMAN | BRISC and BRCA1-A complex member 1                                          | 3  | 3,8E-01 | 0,55 | 4,8E-02 | 0,31 |
| RAB13_HUMAN | Ras-related protein Rab-13                                                  | 5  | 1,4E-02 | 4,62 | 7,4E-02 | 0,30 |
| IF1AX_HUMAN | Eukaryotic translation initiation factor 1A X-chromosomal                   | 6  | 8,4E-02 | 0,23 | 2,7E-03 | 0,29 |
| SPB10_HUMAN | Serpin B10                                                                  | 9  | 4,4E-01 | 0,60 | 3,3E-02 | 0,29 |
| RHG30_HUMAN | Rho GTPase-activating protein 30                                            | 3  | 2,2E-02 | 3,30 | 5,7E-02 | 0,29 |
| SKP1_HUMAN  | S-phase kinase-associated protein 1                                         | 5  | 8,1E-01 | 1,20 | 9,2E-03 | 0,28 |
| TIAR_HUMAN  | Nucleolysin TIAR                                                            | 2  | 7,4E-01 | 0,78 | 1,6E-02 | 0,28 |
| HBS1L_HUMAN | HBS1-like protein                                                           | 5  | 8,5E-01 | 0,87 | 3,7E-03 | 0,28 |
| CASP8_HUMAN | Caspase-8                                                                   | 3  | 1,9E-01 | 1,75 | 9,2E-03 | 0,28 |
| NRP1_HUMAN  | Neuropilin-1                                                                | 13 | 5,0E-03 | 0,04 | 1,9E-01 | 0,28 |
| PRAF3_HUMAN | PRA1 family protein 3                                                       | 3  | 1,3E-01 | 2,71 | 2,0E-02 | 0,27 |
| U2AF2_HUMAN | Splicing factor U2AF 65 kDa subunit                                         | 8  | 5,4E-01 | 1,52 | 4,4E-02 | 0,27 |
| RAP1A_HUMAN | Ras-related protein Rap-1A                                                  | 2  | 4,1E-02 | 0,41 | 1,9E-01 | 0,27 |
| PSMD8_HUMAN | 26S proteasome non-ATPase regulatory subunit 8                              | 3  | 1,3E-01 | 2,83 | 3,5E-02 | 0,27 |
| SYRC_HUMAN  | Arginine--tRNA ligase cytoplasmic                                           | 38 | 2,7E-03 | 0,24 | 9,4E-02 | 0,27 |
| AMPD3_HUMAN | AMP deaminase 3                                                             | 11 | 8,6E-03 | 0,02 | 2,0E-03 | 0,27 |
| CBX3_HUMAN  | Chromobox protein homolog 3                                                 | 6  | 4,2E-01 | 0,63 | 4,8E-02 | 0,27 |
| PPWD1_HUMAN | Peptidylprolyl isomerase domain and WD repeat-containing protein 1          | 2  | 7,8E-01 | 1,13 | 2,9E-02 | 0,27 |
| BT3L4_HUMAN | Transcription factor BTF3 homolog 4                                         | 6  | 2,5E-01 | 0,55 | 8,2E-03 | 0,26 |
| ARSB_HUMAN  | Arylsulfatase B                                                             | 2  | 8,7E-01 | 0,87 | 3,9E-02 | 0,26 |
| RTN3_HUMAN  | Reticulon-3                                                                 | 2  | 5,6E-04 | 0,28 | 2,7E-01 | 0,25 |
| MESD_HUMAN  | LRP chaperone MESD                                                          | 3  | 7,3E-01 | 0,72 | 4,0E-02 | 0,25 |
| GYS1_HUMAN  | Glycogen [starch] synthase muscle                                           | 4  | 9,7E-01 | 1,03 | 1,4E-02 | 0,25 |
| UN93B_HUMAN | Protein unc-93 homolog B1                                                   | 3  | 2,9E-01 | 0,54 | 3,7E-02 | 0,25 |
| KIF2A_HUMAN | Kinesin-like protein KIF2A                                                  | 2  | 5,5E-01 | 1,52 | 7,2E-03 | 0,25 |
| DAD1_HUMAN  | Dolichyl-diphosphooligosaccharide--protein glycosyltransferase subunit DAD1 | 2  | 4,7E-02 | 8,93 | 1,7E-01 | 0,25 |
| AN32E_HUMAN | Acidic leucine-rich nuclear phosphoprotein 32 family member E               | 6  | 7,9E-01 | 0,90 | 1,2E-02 | 0,23 |

|             |                                                               |    |         |      |         |      |
|-------------|---------------------------------------------------------------|----|---------|------|---------|------|
| GON7_HUMAN  | EKC/KEOPS complex subunit GON7                                | 2  | 1,1E-01 | 7,17 | 3,0E-02 | 0,23 |
| IL8_HUMAN   | Interleukin-8                                                 | 2  | 5,2E-04 | 2,56 | 7,3E-02 | 0,23 |
| EBP2_HUMAN  | Probable rRNA-processing protein EBP2                         | 5  | 8,6E-01 | 0,89 | 4,9E-02 | 0,22 |
| NOLC1_HUMAN | Nucleolar and coiled-body phosphoprotein 1                    | 2  | 1,9E-02 | 0,21 | 7,8E-02 | 0,22 |
| ARRB2_HUMAN | Beta-arrestin-2                                               | 5  | 1,1E-01 | 0,30 | 4,7E-02 | 0,22 |
| SPTC1_HUMAN | Serine palmitoyltransferase 1                                 | 7  | 6,0E-01 | 1,59 | 2,2E-02 | 0,21 |
| AN32B_HUMAN | Acidic leucine-rich nuclear phosphoprotein 32 family member B | 6  | 6,1E-01 | 0,80 | 3,6E-02 | 0,20 |
| NUCL_HUMAN  | Nucleolin                                                     | 49 | 6,3E-01 | 0,77 | 4,9E-02 | 0,20 |
| UBE2Z_HUMAN | Ubiquitin-conjugating enzyme E2 Z                             | 3  | 2,1E-02 | 0,19 | 4,0E-02 | 0,19 |
| MAGD2_HUMAN | Melanoma-associated antigen D2                                | 3  | 6,5E-01 | 0,77 | 1,6E-02 | 0,18 |
| DENR_HUMAN  | Density-regulated protein                                     | 7  | 1,4E-01 | 5,53 | 1,9E-02 | 0,18 |
| ABI1_HUMAN  | Abl interactor 1                                              | 5  | 9,1E-01 | 0,91 | 4,9E-02 | 0,18 |
| HDAC2_HUMAN | Histone deacetylase 2                                         | 4  | 9,5E-01 | 0,94 | 8,7E-03 | 0,18 |
| TRA2B_HUMAN | Transformer-2 protein homolog beta                            | 11 | 9,5E-01 | 0,98 | 4,0E-02 | 0,17 |
| CBX5_HUMAN  | Chromobox protein homolog 5                                   | 7  | 5,0E-03 | 0,17 | 2,0E-03 | 0,16 |
| JMJD6_HUMAN | Bifunctional arginine demethylase and lysyl-hydroxylase JMJD6 | 4  | 2,2E-01 | 0,52 | 1,3E-02 | 0,15 |
| TSP4_HUMAN  | Thrombospondin-4                                              | 5  | 1,2E-01 | 0,33 | 4,6E-02 | 0,15 |
| TCP4_HUMAN  | Activated RNA polymerase II transcriptional coactivator p15   | 7  | 7,4E-02 | 0,14 | 3,9E-02 | 0,15 |
| RL36L_HUMAN | 60S ribosomal protein L36a-like                               | 2  | 2,7E-01 | 1,30 | 2,2E-02 | 0,14 |
| DNJC7_HUMAN | DnaJ homolog subfamily C member 7                             | 16 | 4,6E-02 | 3,88 | 7,4E-02 | 0,14 |
| RU17_HUMAN  | U1 small nuclear ribonucleoprotein 70 kDa                     | 10 | 3,8E-01 | 0,53 | 1,1E-02 | 0,14 |
| M3K20_HUMAN | Mitogen-activated protein kinase kinase kinase 20             | 4  | 7,6E-01 | 0,87 | 2,6E-02 | 0,14 |
| NVL_HUMAN   | Nuclear valosin-containing protein-like                       | 2  | 2,3E-01 | 0,54 | 4,1E-02 | 0,13 |
| TOP1_HUMAN  | DNA topoisomerase 1                                           | 9  | 7,2E-01 | 0,72 | 1,3E-02 | 0,13 |
| TBB3_HUMAN  | Tubulin beta-3 chain                                          | 3  | 1,7E-02 | 8,53 | 1,1E-01 | 0,13 |
| IF2B_HUMAN  | Eukaryotic translation initiation factor 2 subunit 2          | 17 | 8,4E-01 | 0,76 | 4,6E-02 | 0,11 |
| PLEK_HUMAN  | Pleckstrin                                                    | 16 | 4,8E-01 | 2,02 | 2,8E-02 | 0,11 |
| UGGG1_HUMAN | UDP-glucose:glycoprotein glucosyltransferase 1                | 38 | 4,0E-01 | 0,40 | 1,3E-02 | 0,10 |

|             |                                                     |    |         |      |         |      |
|-------------|-----------------------------------------------------|----|---------|------|---------|------|
| SRSF6_HUMAN | Serine/arginine-rich splicing factor 6              | 6  | 1,6E-03 | 0,25 | 2,5E-03 | 0,10 |
| SMAP_HUMAN  | Small acidic protein                                | 3  | 7,5E-01 | 0,69 | 1,6E-02 | 0,10 |
| ARFG3_HUMAN | ADP-ribosylation factor GTPase-activating protein 3 | 5  | 3,5E-01 | 2,24 | 1,4E-02 | 0,09 |
| CHMP5_HUMAN | Charged multivesicular body protein 5               | 5  | 5,8E-01 | 0,79 | 1,9E-02 | 0,09 |
| SRSF2_HUMAN | Serine/arginine-rich splicing factor 2              | 5  | 7,3E-01 | 0,67 | 3,4E-02 | 0,06 |
| TEBP_HUMAN  | Prostaglandin E synthase 3                          | 10 | 5,6E-01 | 0,69 | 1,5E-02 | 0,03 |
