# Supplementary material for: Enhancing the correlation betweenin vitroandin vivoexperiments in dental implant osseointegration: investigating the role of Ca ions
Source: Royal Society of Chemistry journal article supplement (doi:10.1039/d3tb02694a), 2024-01-01
Supplement: d3tb02694a2.pdf [file d3tb02694a2.pdf]

**Supplementary Table 2.** Comparative analysis between the proteomic results obtained with the HO<sub>b</sub> cells cultured on UnicCa with respect the proteomic results obtained with C samples at 1, 7 and 14 days. Proteins with  $p \leq 0.05$  (yellow) and a ratio higher than 1.5 in either direction were considered as significantly different. Up-regulated proteins in HO<sub>b</sub> cultured on UnicCa are marked in red, while those downregulated are marked in green.

| Uniprot entry | Protein name                                   | Unique peptide | Day 1   |                | Day 7   |                | Day 14  |                |
|---------------|------------------------------------------------|----------------|---------|----------------|---------|----------------|---------|----------------|
|               |                                                |                | p value | Ratio UnicCa/C | p value | Ratio UnicCa/C | p value | Ratio UnicCa/C |
| SMD2_HUMAN    | Small nuclear ribonucleoprotein Sm D2          | 3              | 5,7E-01 | 0,30           | 3,0E-01 | 5,11           | 1,6E-02 | 10,11          |
| DJC13_HUMAN   | DnaJ homolog subfamily C member 13             | 10             | 3,9E-01 | 3,16           | 2,0E-01 | 8,79           | 2,8E-02 | 9,76           |
| HNRDL_HUMAN   | Heterogeneous nuclear ribonucleoprotein D-like | 10             | 6,0E-01 | 0,53           | 3,2E-02 | 29,16          | 5,9E-02 | 5,04           |
| RAB34_HUMAN   | Ras-related protein Rab-34                     | 5              | 7,7E-01 | 1,13           | 9,2E-02 | 1,90           | 3,1E-02 | 3,91           |
| 4F2_HUMAN     | 4F2 cell-surface antigen heavy chain           | 12             | 6,7E-01 | 0,95           | 3,0E-03 | 4,38           | 3,6E-02 | 3,65           |
| DDR2_HUMAN    | Discoidin domain-containing receptor 2         | 2              | 4,2E-01 | 1,27           | 4,0E-02 | 6,83           | 8,0E-02 | 3,60           |
| RENBP_HUMAN   | N-acylglucosamine 2-epimerase                  | 2              | 4,9E-01 | 1,42           | 3,2E-01 | 1,90           | 4,4E-02 | 2,99           |
| PLIN2_HUMAN   | Perilipin-2                                    | 4              | 4,3E-02 | 0,35           | 2,2E-01 | 1,75           | 8,5E-02 | 2,97           |
| PARP4_HUMAN   | Protein mono-ADP-ribosyltransferase PARP4      | 16             | 2,8E-01 | 1,66           | 4,6E-01 | 1,35           | 8,8E-03 | 2,84           |
| FA10_HUMAN    | Coagulation factor X                           | 5              | 3,4E-04 | 2,76           | 3,0E-02 | 5,90           | 4,6E-04 | 2,72           |
| PZP_HUMAN     | Pregnancy zone protein                         | 2              | 1,8E-02 | 7,98           | 3,6E-01 | 4,45           | 5,6E-01 | 2,63           |
| ANTR2_HUMAN   | Anthrax toxin receptor 2                       | 3              | 9,3E-01 | 0,95           | 1,6E-01 | 3,36           | 3,8E-02 | 2,63           |
| CNOT7_HUMAN   | CCR4-NOT transcription complex subunit 7       | 2              | 6,8E-01 | 0,69           | 2,6E-01 | 2,81           | 1,0E-02 | 2,56           |
| EXOC7_HUMAN   | Exocyst complex component 7                    | 2              | 2,8E-01 | 0,53           | 1,9E-01 | 0,52           | 7,3E-03 | 2,45           |
| MIRO1_HUMAN   | Mitochondrial Rho GTPase 1                     | 2              | 1,7E-02 | 2,08           | 1,3E-01 | 2,32           | 5,3E-02 | 2,36           |
| VATH_HUMAN    | V-type proton ATPase subunit H                 | 8              | 7,6E-01 | 0,86           | 1,6E-01 | 2,79           | 4,7E-02 | 2,28           |
| HPCL1_HUMAN   | Hippocalcin-like protein 1                     | 5              | 2,5E-01 | 2,94           | 1,7E-03 | 0,15           | 3,0E-01 | 2,26           |
| MTCH2_HUMAN   | Mitochondrial carrier homolog 2                | 9              | 4,6E-01 | 0,68           | 4,1E-02 | 5,73           | 2,6E-01 | 2,09           |
| CCN1_HUMAN    | CCN family member 1                            | 7              | 5,2E-01 | 0,60           | 1,7E-01 | 2,08           | 2,9E-02 | 2,05           |
| TM9S3_HUMAN   | Transmembrane 9 superfamily member 3           | 6              | 9,4E-01 | 1,05           | 2,8E-03 | 0,51           | 8,7E-02 | 2,03           |
| PDIP2_HUMAN   | Polymerase delta-interacting protein 2         | 3              | 9,7E-01 | 1,03           | 7,1E-03 | 7,38           | 1,7E-01 | 2,02           |
| RL34_HUMAN    | 60S ribosomal protein L34                      | 5              | 2,4E-02 | 0,11           | 8,6E-01 | 0,90           | 5,2E-02 | 2,01           |

|             |                                                                   |    |         |       |         |        |         |      |
|-------------|-------------------------------------------------------------------|----|---------|-------|---------|--------|---------|------|
| TFPI2_HUMAN | Tissue factor pathway inhibitor 2                                 | 5  | 1       | 1,00  | 1,2E-02 | 3,52   | 2,1E-01 | 1,99 |
| KAPCB_HUMAN | cAMP-dependent protein kinase catalytic subunit beta              | 1  | 1       | 1,00  | 5,2E-01 | 1,30   | 3,4E-02 | 1,97 |
| RT27_HUMAN  | 28S ribosomal protein S27 mitochondrial                           | 3  | 1,6E-01 | 1,71  | 8,4E-02 | 3,99   | 1,4E-02 | 1,94 |
| MYLK_HUMAN  | Myosin light chain kinase smooth muscle                           | 12 | 4,6E-01 | 1,70  | 2,7E-01 | 5,23   | 3,7E-03 | 1,93 |
| KAD3_HUMAN  | GTP:AMP phosphotransferase AK3 mitochondrial                      | 5  | 1,3E-01 | 2,29  | 4,7E-01 | 0,55   | 8,7E-03 | 1,90 |
| PHB_HUMAN   | Prohibitin                                                        | 17 | 3,1E-02 | 1,52  | 2,2E-01 | 2,84   | 2,7E-01 | 1,88 |
| ARMT1_HUMAN | Damage-control phosphatase ARMT1                                  | 3  | 7,1E-02 | 0,38  | 2,3E-01 | 3,67   | 4,2E-02 | 1,88 |
| MYO10_HUMAN | Unconventional myosin-X                                           | 6  | 4,9E-01 | 2,08  | 3,8E-02 | 2,52   | 4,5E-01 | 1,87 |
| EIF3G_HUMAN | Eukaryotic translation initiation factor 3 subunit G              | 6  | 8,7E-01 | 0,89  | 1,9E-02 | 5,84   | 2,2E-01 | 1,86 |
| PENK_HUMAN  | Proenkephalin-A                                                   | 21 | 7,2E-02 | 3,08  | 2,0E-01 | 3,73   | 1,6E-02 | 1,86 |
| TR112_HUMAN | Multifunctional methyltransferase subunit TRM112-like protein     | 3  | 8,8E-01 | 1,10  | 1,6E-02 | 0,52   | 2,3E-01 | 1,80 |
| RIC8A_HUMAN | Synembryn-A                                                       | 6  | 4,4E-01 | 0,55  | 2,8E-02 | 5,37   | 1,2E-01 | 1,78 |
| PRG4_HUMAN  | Proteoglycan 4                                                    | 9  | 5,4E-01 | 0,64  | 5,3E-01 | 2,17   | 2,7E-02 | 1,77 |
| SYMC_HUMAN  | Methionine--tRNA ligase cytoplasmic                               | 12 | 8,6E-01 | 0,93  | 1,2E-01 | 3,19   | 2,3E-02 | 1,76 |
| K2C1B_HUMAN | Keratin type II cytoskeletal 1b                                   | 3  | 2,4E-02 | 3,31  | 4,3E-01 | 1,71   | 5,3E-02 | 1,75 |
| CMC1_HUMAN  | Calcium-binding mitochondrial carrier protein Aralar1             | 5  | 3,4E-01 | 0,56  | 4,3E-02 | 2,11   | 2,2E-01 | 1,72 |
| PON2_HUMAN  | Serum paraoxonase/arylesterase 2                                  | 5  | 8,3E-01 | 0,88  | 3,0E-01 | 1,92   | 3,2E-02 | 1,71 |
| LA_HUMAN    | Lupus La protein                                                  | 10 | 3,3E-01 | 1,93  | 6,0E-01 | 0,78   | 4,3E-02 | 1,69 |
| ACACA_HUMAN | Acetyl-CoA carboxylase 1                                          | 2  | 9,2E-01 | 0,96  | 1,7E-01 | 2,70   | 5,0E-03 | 1,68 |
| PPCEL_HUMAN | Prolyl endopeptidase-like                                         | 3  | 6,1E-01 | 0,60  | 8,0E-02 | 3,69   | 3,4E-02 | 1,68 |
| TIMP3_HUMAN | Metalloproteinase inhibitor 3                                     | 11 | 1,0E-02 | 8,35  | 1,3E-01 | 3,21   | 8,4E-03 | 1,67 |
| PACN2_HUMAN | Protein kinase C and casein kinase substrate in neurons protein 2 | 7  | 8,3E-01 | 0,88  | 9,9E-01 | 1,01   | 2,0E-02 | 1,67 |
| FCL_HUMAN   | GDP-L-fucose synthase                                             | 7  | 3,1E-01 | 2,18  | 1,5E-01 | 6,19   | 4,2E-02 | 1,66 |
| PI42A_HUMAN | Phosphatidylinitol 5-phosphate 4-kinase type-2 alpha              | 3  | 8,4E-01 | 1,08  | 1,3E-01 | 2,34   | 2,2E-02 | 1,65 |
| TSNAX_HUMAN | Translin-associated protein X                                     | 5  | 1,3E-01 | 12,80 | 8,4E-06 | 209,63 | 8,1E-01 | 1,65 |
| MAOM_HUMAN  | NAD-dependent malic enzyme mitochondrial                          | 8  | 1,7E-01 | 1,71  | 3,4E-02 | 1,80   | 2,0E-02 | 1,64 |
| SCFD1_HUMAN | Sec1 family domain-containing protein 1                           | 15 | 7,0E-01 | 1,31  | 1,8E-01 | 0,48   | 4,1E-02 | 1,63 |

|             |                                                                        |    |         |       |         |       |         |      |
|-------------|------------------------------------------------------------------------|----|---------|-------|---------|-------|---------|------|
| CALM2_HUMAN | Calmodulin-2                                                           | 8  | 1,3E-01 | 2,85  | 5,0E-01 | 1,94  | 2,0E-02 | 1,63 |
| MCCB_HUMAN  | Methylcrotonoyl-CoA carboxylase beta chain mitochondrial               | 2  | 5,0E-01 | 0,56  | 7,0E-01 | 1,12  | 2,0E-02 | 1,63 |
| DGKA_HUMAN  | Diacylglycerol kinase alpha                                            | 7  | 1,0E-01 | 0,23  | 1,8E-02 | 14,34 | 2,9E-01 | 1,63 |
| STAM1_HUMAN | Signal transducing adapter molecule 1                                  | 5  | 6,1E-01 | 1,41  | 1,7E-01 | 6,26  | 3,8E-02 | 1,62 |
| OCAD1_HUMAN | OCIA domain-containing protein 1                                       | 5  | 1,3E-01 | 0,76  | 1,4E-02 | 7,19  | 9,6E-02 | 1,61 |
| KLC1_HUMAN  | Kinesin light chain 1                                                  | 17 | 7,8E-01 | 0,89  | 2,6E-02 | 4,89  | 8,8E-02 | 1,61 |
| LCAP_HUMAN  | Leucyl-cystinyl aminopeptidase                                         | 5  | 7,7E-02 | 0,43  | 7,7E-01 | 0,83  | 6,9E-05 | 1,61 |
| WLS_HUMAN   | Protein wntless homolog                                                | 2  | 4,8E-02 | 3,07  | 3,1E-01 | 2,51  | 1,5E-01 | 1,61 |
| ABI1_HUMAN  | Abl interactor 1                                                       | 4  | 3,4E-01 | 1,41  | 2,2E-02 | 2,11  | 4,8E-02 | 1,60 |
| CSPG2_HUMAN | Versican core protein                                                  | 12 | 1,1E-01 | 3,60  | 1,0E+00 | 1,00  | 6,8E-03 | 1,59 |
| NU133_HUMAN | Nuclear pore complex protein Nup133                                    | 2  | 3,4E-01 | 0,59  | 4,9E-02 | 4,14  | 1,2E-01 | 1,59 |
| PP2AB_HUMAN | Serine/threonine-protein phosphatase 2A catalytic subunit beta isoform | 1  | 3,3E-01 | 1,69  | 2,5E-01 | 1,73  | 2,1E-02 | 1,59 |
| ARFG2_HUMAN | ADP-ribosylation factor GTPase-activating protein 2                    | 2  | 2,8E-02 | 3,47  | 2,6E-01 | 2,66  | 4,8E-02 | 1,55 |
| RHG17_HUMAN | Rho GTPase-activating protein 17                                       | 5  | 7,1E-02 | 2,20  | 6,1E-01 | 1,89  | 4,5E-02 | 1,55 |
| RAB14_HUMAN | Ras-related protein Rab-14                                             | 12 | 3,8E-02 | 1,91  | 3,5E-01 | 1,81  | 2,1E-01 | 1,54 |
| MGN_HUMAN   | Protein mago nashi homolog                                             | 5  | 8,5E-01 | 1,12  | 8,5E-01 | 1,19  | 4,5E-02 | 1,54 |
| GNAI3_HUMAN | Guanine nucleotide-binding protein G(i) subunit alpha                  | 3  | 5,6E-01 | 1,28  | 2,4E-01 | 2,26  | 2,4E-02 | 1,54 |
| FLNC_HUMAN  | Filamin-C                                                              | 2  | 4,0E-02 | 11,91 | 6,6E-01 | 1,39  | 7,7E-01 | 1,54 |
| PPME1_HUMAN | Protein phosphatase methylesterase 1                                   | 6  | 5,1E-01 | 0,47  | 1,1E-01 | 3,10  | 2,3E-02 | 1,54 |
| PRP31_HUMAN | U4/U6 small nuclear ribonucleoprotein Prp31                            | 3  | 6,3E-01 | 1,17  | 2,0E-02 | 0,19  | 4,1E-01 | 1,52 |
| TPBG_HUMAN  | Trophoblast glycoprotein                                               | 3  | 3,6E-01 | 1,39  | 1,5E-01 | 2,93  | 3,2E-02 | 1,52 |
| KCRB_HUMAN  | Creatine kinase B-type                                                 | 21 | 3,4E-02 | 1,57  | 2,9E-01 | 2,07  | 5,7E-02 | 1,51 |
| WASF2_HUMAN | Wiskott-Aldrich syndrome protein family member 2                       | 3  | 3,0E-01 | 1,41  | 2,5E-01 | 3,42  | 4,8E-02 | 1,50 |
| GNPI2_HUMAN | Glucosamine-6-phosphate isomerase 2                                    | 4  | 6,7E-01 | 0,74  | 2,7E-02 | 13,06 | 3,1E-01 | 1,48 |
| ATD3B_HUMAN | ATPase family AAA domain-containing protein 3B                         | 1  | 1       | 1,00  | 2,1E-02 | 0,46  | 4,2E-01 | 1,45 |
| DDX3X_HUMAN | ATP-dependent RNA helicase DDX3X                                       | 21 | 8,4E-01 | 0,93  | 2,2E-02 | 1,77  | 1,1E-01 | 1,45 |
| CHP1_HUMAN  | Calcineurin B homologous protein 1                                     | 4  | 1,1E-02 | 2,63  | 7,9E-02 | 7,57  | 7,7E-02 | 1,42 |

|             |                                                                     |    |         |      |         |       |         |      |
|-------------|---------------------------------------------------------------------|----|---------|------|---------|-------|---------|------|
| TBA4A_HUMAN | Tubulin alpha-4A chain                                              | 7  | 1,3E-02 | 1,52 | 5,5E-01 | 3,49  | 3,1E-01 | 1,42 |
| CPSF5_HUMAN | Cleavage and polyadenylation specificity factor subunit 5           | 6  | 4,8E-02 | 2,00 | 1,5E-01 | 3,87  | 2,8E-01 | 1,41 |
| CLAP1_HUMAN | CLIP-associating protein 1                                          | 4  | 1,9E-01 | 0,17 | 2,8E-02 | 2,79  | 7,9E-02 | 1,41 |
| NDRG3_HUMAN | Protein NDRG3                                                       | 3  | 7,6E-01 | 1,17 | 4,1E-02 | 4,81  | 4,7E-01 | 1,39 |
| MAGD2_HUMAN | Melanoma-associated antigen D2                                      | 4  | 9,8E-01 | 1,01 | 3,6E-02 | 13,44 | 2,7E-03 | 1,38 |
| RADI_HUMAN  | Radixin                                                             | 10 | 9,1E-01 | 0,95 | 2,4E-02 | 3,51  | 1,0E-01 | 1,38 |
| CDC5L_HUMAN | Cell division cycle 5-like protein                                  | 2  | 3,3E-02 | 5,20 | 5,1E-01 | 1,62  | 3,8E-01 | 1,37 |
| DNJB1_HUMAN | DnaJ homolog subfamily B member 1                                   | 4  | 4,9E-01 | 1,59 | 4,8E-02 | 2,34  | 5,0E-02 | 1,37 |
| SSRP1_HUMAN | FACT complex subunit SSRP1                                          | 4  | 9,0E-01 | 0,87 | 7,5E-03 | 26,67 | 7,7E-01 | 1,36 |
| FLOT1_HUMAN | Flotillin-1                                                         | 12 | 6,9E-01 | 1,53 | 2,2E-02 | 10,72 | 3,2E-01 | 1,35 |
| VCIP1_HUMAN | Deubiquitinating protein VCIP135                                    | 3  | 4,6E-01 | 1,14 | 2,8E-02 | 0,34  | 6,2E-01 | 1,35 |
| RL26_HUMAN  | 60S ribosomal protein L26                                           | 12 | 3,2E-02 | 2,05 | 2,0E-01 | 6,81  | 2,7E-01 | 1,34 |
| RRAGC_HUMAN | Ras-related GTP-binding protein C                                   | 7  | 7,3E-02 | 2,83 | 1,1E-02 | 18,44 | 2,7E-01 | 1,33 |
| UFD1_HUMAN  | Ubiquitin recognition factor in ER-associated degradation protein 1 | 4  | 4,1E-03 | 7,29 | 4,0E-01 | 2,76  | 4,7E-01 | 1,32 |
| ACON_HUMAN  | Aconitate hydratase mitochondrial                                   | 20 | 4,0E-01 | 0,76 | 4,0E-02 | 0,59  | 6,3E-01 | 1,32 |
| ANXA7_HUMAN | Annexin A7                                                          | 16 | 4,9E-02 | 1,53 | 2,1E-01 | 5,06  | 1,8E-01 | 1,32 |
| VPS4A_HUMAN | Vacuolar protein sorting-associated protein 4A                      | 3  | 9,5E-03 | 0,17 | 4,1E-01 | 0,64  | 5,8E-01 | 1,32 |
| PARVA_HUMAN | Alpha-parvin                                                        | 8  | 3,6E-02 | 2,63 | 8,2E-01 | 1,30  | 6,4E-01 | 1,32 |
| RL24_HUMAN  | 60S ribosomal protein L24                                           | 7  | 3,9E-02 | 1,54 | 9,3E-01 | 1,08  | 4,3E-01 | 1,31 |
| F120A_HUMAN | Constitutive coactivator of PPAR-gamma-like protein 1               | 11 | 2,0E-02 | 2,13 | 7,0E-02 | 8,44  | 9,8E-02 | 1,31 |
| CLC11_HUMAN | C-type lectin domain family 11 member A                             | 4  | 2,0E-01 | 0,47 | 2,6E-03 | 0,27  | 5,0E-01 | 1,31 |
| ERLN2_HUMAN | Erlin-2                                                             | 13 | 1,3E-01 | 1,95 | 2,9E-03 | 3,15  | 4,1E-01 | 1,30 |
| TOM1_HUMAN  | Target of Myb protein 1                                             | 12 | 7,4E-03 | 1,82 | 5,6E-02 | 4,54  | 2,8E-01 | 1,30 |
| PSMD5_HUMAN | 26S proteasome non-ATPase regulatory subunit 5                      | 12 | 4,5E-02 | 1,88 | 5,7E-01 | 1,44  | 3,4E-01 | 1,30 |
| M2OM_HUMAN  | Mitochondrial 2-oxoglutarate/malate carrier protein                 | 9  | 3,9E-01 | 1,50 | 4,4E-02 | 4,05  | 9,8E-02 | 1,30 |
| EIF3L_HUMAN | Eukaryotic translation initiation factor 3 subunit L                | 13 | 4,0E-02 | 1,92 | 2,6E-01 | 2,36  | 2,1E-02 | 1,29 |
| SFXN3_HUMAN | Sideroflexin-3                                                      | 12 | 4,1E-02 | 1,64 | 3,6E-01 | 2,24  | 2,4E-01 | 1,29 |

|             |                                                   |    |         |      |         |       |         |      |
|-------------|---------------------------------------------------|----|---------|------|---------|-------|---------|------|
| CAH2_HUMAN  | Carbonic anhydrase 2                              | 19 | 2,4E-02 | 1,59 | 5,5E-01 | 1,25  | 2,0E-01 | 1,29 |
| ARSB_HUMAN  | Arylsulfatase B                                   | 16 | 3,9E-02 | 2,19 | 4,2E-01 | 1,23  | 1,0E-01 | 1,27 |
| CTNB1_HUMAN | Catenin beta-1                                    | 3  | 5,8E-01 | 1,18 | 2,8E-02 | 2,56  | 3,3E-01 | 1,27 |
| TMX3_HUMAN  | Protein disulfide-isomerase TMX3                  | 7  | 4,7E-02 | 2,55 | 5,0E-01 | 0,75  | 2,9E-01 | 1,27 |
| CSRP1_HUMAN | Cysteine and glycine-rich protein 1               | 5  | 4,5E-02 | 2,16 | 1,4E-01 | 1,69  | 9,6E-02 | 1,27 |
| MYL6_HUMAN  | Myosin light polypeptide 6                        | 14 | 2,7E-01 | 1,19 | 3,1E-02 | 1,76  | 2,2E-01 | 1,26 |
| GNL1_HUMAN  | Guanine nucleotide-binding protein-like 1         | 2  | 9,7E-02 | 1,50 | 3,4E-02 | 3,33  | 3,3E-01 | 1,26 |
| RTCB_HUMAN  | RNA-splicing ligase RtcB homolog                  | 17 | 4,9E-02 | 2,63 | 6,9E-01 | 0,73  | 5,8E-01 | 1,26 |
| GREM1_HUMAN | Gremlin-1                                         | 5  | 1       | 1,00 | 3,2E-03 | 0,19  | 6,3E-01 | 1,26 |
| MEMO1_HUMAN | Protein MEMO1                                     | 6  | 3,2E-02 | 2,24 | 2,4E-01 | 3,00  | 8,5E-02 | 1,24 |
| RL11_HUMAN  | 60S ribosomal protein L11                         | 6  | 2,0E-02 | 1,63 | 3,9E-01 | 2,33  | 1,7E-01 | 1,23 |
| ERF1_HUMAN  | Eukaryotic peptide chain release factor subunit 1 | 10 | 2,4E-02 | 2,14 | 6,3E-01 | 1,52  | 4,5E-01 | 1,23 |
| SPRY4_HUMAN | SPRY domain-containing protein 4                  | 3  | 4,6E-01 | 0,61 | 3,3E-02 | 7,39  | 7,2E-01 | 1,23 |
| PGES2_HUMAN | Prostaglandin E synthase 2                        | 4  | 1,9E-01 | 0,54 | 2,6E-02 | 7,73  | 5,0E-01 | 1,22 |
| HEP2_HUMAN  | Heparin cofactor 2                                | 5  | 9,2E-01 | 0,97 | 1,5E-04 | 0,31  | 5,9E-01 | 1,21 |
| PRAF3_HUMAN | PRA1 family protein 3                             | 10 | 3,9E-02 | 1,62 | 3,0E-01 | 2,74  | 7,9E-02 | 1,21 |
| MAT2B_HUMAN | Methionine adenosyltransferase 2 subunit beta     | 7  | 2,6E-02 | 1,57 | 2,9E-01 | 2,92  | 2,9E-01 | 1,21 |
| PPGB_HUMAN  | Lysosomal protective protein                      | 8  | 1,2E-01 | 1,62 | 3,2E-02 | 5,05  | 5,7E-01 | 1,21 |
| ABCF3_HUMAN | ATP-binding cassette sub-family F member 3        | 4  | 4,8E-01 | 1,40 | 2,2E-02 | 0,35  | 4,1E-01 | 1,21 |
| SYYC_HUMAN  | Tyrosine--tRNA ligase cytoplasmic                 | 15 | 8,7E-02 | 5,80 | 2,5E-02 | 10,66 | 2,3E-01 | 1,20 |
| MAP1A_HUMAN | Microtubule-associated protein 1A                 | 26 | 4,5E-02 | 1,88 | 4,1E-01 | 1,57  | 4,6E-01 | 1,19 |
| ITIH1_HUMAN | Inter-alpha-trypsin inhibitor heavy chain H1      | 3  | 3,0E-01 | 0,86 | 3,4E-03 | 0,52  | 6,6E-01 | 1,18 |
| ITB1_HUMAN  | Integrin beta-1                                   | 25 | 2,1E-02 | 1,71 | 4,0E-01 | 1,63  | 4,0E-01 | 1,18 |
| RFIP5_HUMAN | Rab11 family-interacting protein 5                | 14 | 1,3E-03 | 0,06 | 5,5E-01 | 0,86  | 5,5E-01 | 1,18 |
| RS3_HUMAN   | 40S ribosomal protein S3                          | 22 | 1,1E-01 | 1,43 | 4,6E-02 | 2,00  | 1,9E-01 | 1,18 |
| STAM2_HUMAN | Signal transducing adapter molecule 2             | 3  | 2,9E-02 | 0,43 | 1,5E-01 | 4,42  | 2,2E-01 | 1,18 |
| EPG5_HUMAN  | Ectopic P granules protein 5 homolog              | 3  | 9,5E-01 | 0,97 | 1,6E-02 | 3,05  | 5,2E-01 | 1,16 |
| RAB18_HUMAN | Ras-related protein Rab-18                        | 11 | 1,6E-02 | 2,34 | 1,9E-01 | 2,26  | 6,6E-01 | 1,16 |

|             |                                                                |    |         |      |         |      |         |      |
|-------------|----------------------------------------------------------------|----|---------|------|---------|------|---------|------|
| FXR2_HUMAN  | Fragile X mental retardation syndrome-related protein 2        | 2  | 4,2E-02 | 1,67 | 2,9E-01 | 2,10 | 3,4E-01 | 1,16 |
| CBX3_HUMAN  | Chromobox protein homolog 3                                    | 3  | 1,9E-02 | 2,12 | 3,8E-02 | 0,30 | 7,3E-01 | 1,16 |
| RAB1C_HUMAN | Putative Ras-related protein Rab-1C                            | 1  | 1       | 1,00 | 5,0E-02 | 4,08 | 4,3E-01 | 1,16 |
| SEC13_HUMAN | Protein SEC13 homolog                                          | 7  | 4,9E-03 | 1,65 | 2,4E-01 | 0,67 | 5,9E-01 | 1,16 |
| OSBL8_HUMAN | Oxysterol-binding protein-related protein 8                    | 6  | 4,8E-02 | 0,35 | 7,0E-02 | 3,18 | 4,3E-01 | 1,15 |
| GPDM_HUMAN  | Glycerol-3-phosphate dehydrogenase mitochondrial               | 15 | 8,2E-01 | 1,06 | 2,4E-02 | 2,74 | 5,5E-01 | 1,15 |
| DIAP1_HUMAN | Protein diaphanous homolog 1                                   | 13 | 1,4E-02 | 8,62 | 2,2E-01 | 2,97 | 5,2E-01 | 1,15 |
| AN32E_HUMAN | Acidic leucine-rich nuclear phosphoprotein 32 family member E  | 3  | 1,0E+00 | 1,00 | 3,0E-02 | 4,22 | 2,5E-01 | 1,15 |
| HAT1_HUMAN  | Histone acetyltransferase type B catalytic subunit             | 4  | 4,4E-02 | 2,75 | 6,8E-01 | 0,73 | 5,1E-01 | 1,15 |
| PSMD3_HUMAN | 26S proteasome non-ATPase regulatory subunit 3                 | 15 | 5,6E-01 | 1,75 | 5,0E-02 | 3,32 | 2,5E-01 | 1,14 |
| BAG2_HUMAN  | BAG family molecular chaperone regulator 2                     | 4  | 3,8E-02 | 2,78 | 2,0E-02 | 3,21 | 5,9E-01 | 1,14 |
| ERGI1_HUMAN | Endoplasmic reticulum-Golgi intermediate compartment protein 1 | 4  | 9,4E-01 | 1,05 | 4,0E-02 | 6,38 | 5,0E-01 | 1,13 |
| SH3K1_HUMAN | SH3 domain-containing kinase-binding protein 1                 | 4  | 4,4E-01 | 1,58 | 7,9E-03 | 7,10 | 5,6E-01 | 1,13 |
| RAB13_HUMAN | Ras-related protein Rab-13                                     | 4  | 3,9E-02 | 2,60 | 1,2E-01 | 4,60 | 6,2E-01 | 1,13 |
| EHD2_HUMAN  | EH domain-containing protein 2                                 | 23 | 2,6E-02 | 1,61 | 6,3E-01 | 1,12 | 2,7E-01 | 1,13 |
| TADBP_HUMAN | TAR DNA-binding protein 43                                     | 6  | 1,3E-01 | 1,48 | 9,0E-03 | 0,64 | 5,1E-01 | 1,12 |
| RAC2_HUMAN  | Ras-related C3 botulinum toxin substrate 2                     | 4  | 3,0E-02 | 2,28 | 9,4E-01 | 0,97 | 8,3E-01 | 1,12 |
| GDIR1_HUMAN | Rho GDP-dissociation inhibitor 1                               | 14 | 4,2E-02 | 1,56 | 7,1E-02 | 1,97 | 4,4E-01 | 1,12 |
| DC1L2_HUMAN | Cytoplasmic dynein 1 light intermediate chain 2                | 7  | 4,2E-01 | 2,60 | 3,2E-02 | 6,13 | 6,5E-01 | 1,11 |
| RL14_HUMAN  | 60S ribosomal protein L14                                      | 8  | 3,9E-02 | 2,81 | 2,1E-01 | 1,66 | 2,9E-01 | 1,11 |
| CAPR1_HUMAN | Caprin-1                                                       | 9  | 9,6E-01 | 0,97 | 4,6E-02 | 4,57 | 1,9E-01 | 1,11 |
| NFKB2_HUMAN | Nuclear factor NF-kappa-B p100 subunit                         | 4  | 9,3E-01 | 1,06 | 1,4E-02 | 0,48 | 7,2E-01 | 1,11 |
| THIO_HUMAN  | Thioredoxin                                                    | 7  | 1,7E-02 | 4,18 | 3,5E-01 | 3,11 | 6,5E-01 | 1,10 |
| YAP1_HUMAN  | Transcriptional coactivator YAP1                               | 7  | 3,9E-02 | 3,83 | 8,1E-01 | 1,25 | 8,4E-01 | 1,10 |
| PIEZ1_HUMAN | Piezo-type mechanosensitive ion channel component 1            | 3  | 2,4E-02 | 0,41 | 1,2E-01 | 3,33 | 6,1E-01 | 1,10 |
| PSA6_HUMAN  | Proteasome subunit alpha type-6                                | 12 | 3,1E-02 | 1,58 | 5,3E-01 | 1,37 | 4,6E-01 | 1,10 |
| TERA_HUMAN  | Transitional endoplasmic reticulum ATPase                      | 59 | 5,0E-02 | 1,51 | 3,3E-01 | 1,85 | 4,6E-01 | 1,10 |

|             |                                                                            |    |         |      |         |      |         |      |
|-------------|----------------------------------------------------------------------------|----|---------|------|---------|------|---------|------|
| 1433Z_HUMAN | 14-3-3 protein zeta/delta                                                  | 24 | 9,6E-03 | 1,65 | 1,3E-01 | 1,99 | 7,2E-02 | 1,10 |
| PPCE_HUMAN  | Prolyl endopeptidase                                                       | 9  | 2,2E-01 | 1,49 | 7,0E-03 | 2,77 | 7,8E-01 | 1,10 |
| MK01_HUMAN  | Mitogen-activated protein kinase 1                                         | 10 | 9,5E-01 | 1,02 | 2,5E-03 | 0,55 | 7,8E-01 | 1,10 |
| GBF1_HUMAN  | Golgi-specific brefeldin A-resistance guanine nucleotide exchange factor 1 | 7  | 2,3E-01 | 2,82 | 4,4E-02 | 7,28 | 8,5E-01 | 1,09 |
| SEM3C_HUMAN | Semaphorin-3C                                                              | 8  | 4,0E-02 | 5,18 | 5,9E-01 | 1,79 | 5,2E-01 | 1,09 |
| PWP1_HUMAN  | Periodic tryptophan protein 1 homolog                                      | 2  | 3,8E-01 | 1,74 | 4,0E-02 | 2,69 | 7,5E-01 | 1,09 |
| ASCC3_HUMAN | Activating signal cointegrator 1 complex subunit 3                         | 3  | 4,5E-01 | 1,51 | 2,3E-02 | 4,07 | 8,1E-01 | 1,09 |
| ARPC4_HUMAN | Actin-related protein 2/3 complex subunit 4                                | 11 | 2,8E-02 | 1,54 | 3,0E-01 | 1,91 | 4,1E-01 | 1,09 |
| FDFT_HUMAN  | Squalene synthase                                                          | 3  | 2,8E-03 | 2,06 | 5,7E-01 | 1,58 | 7,4E-01 | 1,09 |
| CRIP2_HUMAN | Cysteine-rich protein 2                                                    | 8  | 4,1E-02 | 1,69 | 6,4E-01 | 0,93 | 4,6E-01 | 1,08 |
| VAPA_HUMAN  | Vesicle-associated membrane protein-associated protein A                   | 6  | 3,0E-01 | 2,28 | 8,8E-03 | 5,89 | 6,9E-01 | 1,08 |
| PI42C_HUMAN | Phosphatidylinositol 5-phosphate 4-kinase type-2 gamma                     | 2  | 2,5E-02 | 3,49 | 9,9E-01 | 1,00 | 7,4E-01 | 1,08 |
| KAP2_HUMAN  | cAMP-dependent protein kinase type II-alpha regulatory subunit             | 12 | 3,8E-02 | 6,85 | 1,3E-02 | 4,70 | 9,1E-01 | 1,08 |
| CSK21_HUMAN | Casein kinase II subunit alpha                                             | 6  | 7,3E-01 | 1,17 | 1,1E-02 | 2,39 | 6,9E-01 | 1,08 |
| PRKDC_HUMAN | DNA-dependent protein kinase catalytic subunit                             | 68 | 5,6E-04 | 8,69 | 3,6E-02 | 2,50 | 8,0E-01 | 1,08 |
| ATPO_HUMAN  | ATP synthase subunit O mitochondrial                                       | 14 | 3,8E-01 | 0,77 | 4,2E-02 | 2,21 | 7,3E-01 | 1,07 |
| HMGCL_HUMAN | Hydroxymethylglutaryl-CoA lyase mitochondrial                              | 7  | 4,3E-02 | 2,82 | 6,0E-01 | 2,00 | 8,0E-01 | 1,07 |
| NT5D1_HUMAN | 5'-nucleotidase domain-containing protein 1                                | 3  | 7,3E-01 | 0,87 | 3,4E-02 | 1,98 | 7,0E-01 | 1,07 |
| TFR1_HUMAN  | Transferrin receptor protein 1                                             | 19 | 2,1E-02 | 0,17 | 7,6E-01 | 1,33 | 7,2E-01 | 1,06 |
| TENS3_HUMAN | Tensin-3                                                                   | 1  | 3,3E-03 | 1,51 | 8,9E-01 | 1,09 | 9,2E-01 | 1,06 |
| ATLA3_HUMAN | Atlastin-3                                                                 | 23 | 1,8E-02 | 1,52 | 6,0E-01 | 1,21 | 7,4E-02 | 1,06 |
| ADPGK_HUMAN | ADP-dependent glucokinase                                                  | 3  | 2,4E-02 | 1,78 | 5,8E-01 | 1,29 | 8,8E-01 | 1,06 |
| SNX9_HUMAN  | Sorting nexin-9                                                            | 24 | 1,3E-01 | 2,48 | 4,8E-02 | 3,11 | 6,4E-01 | 1,05 |
| SRSF2_HUMAN | Serine/arginine-rich splicing factor 2                                     | 4  | 3,8E-02 | 3,32 | 5,1E-01 | 1,57 | 8,9E-01 | 1,05 |
| JIP4_HUMAN  | C-Jun-amino-terminal kinase-interacting protein 4                          | 18 | 3,5E-02 | 1,59 | 1,4E-01 | 1,84 | 7,9E-01 | 1,05 |
| UBR4_HUMAN  | E3 ubiquitin-protein ligase UBR4                                           | 7  | 5,1E-01 | 0,46 | 1,7E-02 | 8,66 | 8,1E-01 | 1,05 |
| TAGL2_HUMAN | Transgelin-2                                                               | 18 | 2,7E-02 | 1,81 | 9,2E-01 | 0,96 | 8,1E-01 | 1,05 |

|             |                                                                  |    |         |       |         |       |         |      |
|-------------|------------------------------------------------------------------|----|---------|-------|---------|-------|---------|------|
| ANXA6_HUMAN | Annexin A6                                                       | 74 | 4,1E-02 | 1,55  | 2,1E-01 | 1,58  | 6,8E-01 | 1,05 |
| TCP4_HUMAN  | Activated RNA polymerase II transcriptional coactivator p15      | 3  | 9,7E-01 | 0,97  | 3,2E-02 | 2,85  | 8,7E-01 | 1,05 |
| CAN2_HUMAN  | Calpain-2 catalytic subunit                                      | 33 | 4,4E-02 | 1,72  | 6,4E-01 | 0,89  | 8,2E-01 | 1,05 |
| SC24D_HUMAN | Protein transport protein Sec24D                                 | 8  | 4,3E-03 | 1,52  | 3,3E-01 | 1,92  | 8,0E-01 | 1,04 |
| SNAG_HUMAN  | Gamma-soluble NSF attachment protein                             | 3  | 8,6E-01 | 0,89  | 4,8E-02 | 2,80  | 9,2E-01 | 1,04 |
| C1TC_HUMAN  | C-1-tetrahydrofolate synthase cytoplasmic                        | 28 | 3,5E-02 | 1,75  | 2,6E-01 | 7,82  | 9,1E-01 | 1,04 |
| RL35_HUMAN  | 60S ribosomal protein L35                                        | 5  | 9,7E-01 | 1,01  | 4,9E-02 | 1,88  | 8,3E-01 | 1,03 |
| XRCC5_HUMAN | X-ray repair cross-complementing protein 5                       | 28 | 1,0E-01 | 1,47  | 3,1E-02 | 1,64  | 8,9E-01 | 1,03 |
| IF2B2_HUMAN | Insulin-like growth factor 2 mRNA-binding protein 2              | 5  | 9,7E-01 | 0,99  | 1,8E-02 | 5,49  | 9,2E-01 | 1,03 |
| S10AB_HUMAN | Protein S100-A11                                                 | 8  | 3,6E-01 | 1,29  | 4,5E-02 | 4,57  | 9,4E-01 | 1,02 |
| RACK1_HUMAN | Receptor of activated protein C kinase 1                         | 25 | 3,5E-02 | 1,58  | 2,2E-01 | 1,77  | 8,2E-01 | 1,02 |
| RS20_HUMAN  | 40S ribosomal protein S20                                        | 3  | 4,7E-01 | 1,25  | 1,7E-02 | 0,66  | 9,5E-01 | 1,02 |
| RL10A_HUMAN | 60S ribosomal protein L10a                                       | 14 | 8,5E-02 | 1,58  | 3,9E-03 | 0,51  | 9,5E-01 | 1,01 |
| AKT1_HUMAN  | RAC-alpha serine/threonine-protein kinase                        | 2  | 2,7E-01 | 0,11  | 4,5E-02 | 4,59  | 9,6E-01 | 1,01 |
| SKP1_HUMAN  | S-phase kinase-associated protein 1                              | 5  | 1,2E-02 | 3,07  | 6,8E-02 | 7,46  | 9,7E-01 | 1,01 |
| CLIP1_HUMAN | CAP-Gly domain-containing linker protein 1                       | 5  | 3,6E-01 | 0,63  | 3,9E-02 | 0,28  | 9,7E-01 | 1,00 |
| H10_HUMAN   | Histone H1.0                                                     | 5  | 6,0E-02 | 35,61 | 1,4E-02 | 10,63 | 1,0E+00 | 1,00 |
| CD63_HUMAN  | CD63 antigen                                                     | 4  | 1,7E-01 | 1,70  | 1,8E-02 | 5,70  | 9,9E-01 | 1,00 |
| DDX46_HUMAN | Probable ATP-dependent RNA helicase DDX46                        | 5  | 9,3E-01 | 0,88  | 1,1E-02 | 13,73 | 9,8E-01 | 0,99 |
| EGLN_HUMAN  | Endoglin                                                         | 7  | 3,9E-02 | 1,96  | 1,3E-01 | 4,53  | 9,5E-01 | 0,99 |
| ANXA4_HUMAN | Annexin A4                                                       | 29 | 2,1E-02 | 2,48  | 3,3E-01 | 1,65  | 9,4E-01 | 0,99 |
| RL9_HUMAN   | 60S ribosomal protein L9                                         | 11 | 9,7E-03 | 1,90  | 3,8E-01 | 1,48  | 8,7E-01 | 0,99 |
| SNX1_HUMAN  | Sorting nexin-1                                                  | 10 | 7,0E-01 | 1,19  | 8,1E-03 | 0,52  | 9,5E-01 | 0,99 |
| STML2_HUMAN | Stomatin-like protein 2 mitochondrial                            | 8  | 6,4E-01 | 1,19  | 6,8E-04 | 1,78  | 8,8E-01 | 0,98 |
| RM12_HUMAN  | 39S ribosomal protein L12 mitochondrial                          | 2  | 4,3E-02 | 2,31  | 4,4E-01 | 2,70  | 9,2E-01 | 0,98 |
| GBB2_HUMAN  | Guanine nucleotide-binding protein G(I)/G(S)/G(T) subunit beta-2 | 5  | 4,8E-02 | 2,56  | 3,0E-02 | 2,15  | 7,5E-01 | 0,97 |
| SEPT7_HUMAN | Septin-7                                                         | 19 | 9,6E-01 | 0,98  | 1,6E-02 | 1,69  | 7,7E-01 | 0,97 |



|             |                                                         |    |         |      |         |      |         |      |
|-------------|---------------------------------------------------------|----|---------|------|---------|------|---------|------|
| TR150_HUMAN | Thyroid hormone receptor-associated protein 3           | 8  | 2,6E-02 | 0,24 | 4,9E-01 | 0,60 | 9,7E-01 | 0,97 |
| PTGR1_HUMAN | Prostaglandin reductase 1                               | 14 | 3,0E-02 | 1,61 | 9,9E-02 | 1,59 | 7,3E-01 | 0,97 |
| COPZ2_HUMAN | Coatomer subunit zeta-2                                 | 3  | 1,6E-01 | 0,56 | 2,4E-02 | 0,51 | 9,6E-01 | 0,97 |
| UBA3_HUMAN  | NEDD8-activating enzyme E1 catalytic subunit            | 4  | 3,5E-02 | 0,43 | 5,3E-01 | 0,61 | 9,5E-01 | 0,97 |
| NUDC1_HUMAN | NudC domain-containing protein 1                        | 5  | 4,8E-01 | 0,73 | 4,7E-02 | 3,92 | 8,9E-01 | 0,97 |
| PDC6I_HUMAN | Programmed cell death 6-interacting protein             | 35 | 1,7E-02 | 3,23 | 9,5E-02 | 2,65 | 8,6E-01 | 0,96 |
| AK1C1_HUMAN | Aldo-keto reductase family 1 member C1                  | 3  | 1,1E-01 | 2,35 | 1,9E-02 | 0,16 | 9,0E-01 | 0,96 |
| RS15A_HUMAN | 40S ribosomal protein S15a                              | 10 | 4,1E-01 | 1,59 | 2,4E-02 | 1,69 | 8,4E-01 | 0,95 |
| MESD_HUMAN  | LRP chaperone MESD                                      | 3  | 2,0E-01 | 1,28 | 6,6E-03 | 8,31 | 9,1E-01 | 0,95 |
| EIF3I_HUMAN | Eukaryotic translation initiation factor 3 subunit I    | 13 | 3,8E-02 | 1,75 | 2,0E-01 | 0,86 | 7,7E-01 | 0,95 |
| MX1_HUMAN   | Interferon-induced GTP-binding protein Mx1              | 6  | 1,8E-02 | 0,18 | 4,4E-01 | 0,62 | 9,4E-01 | 0,95 |
| DHRS4_HUMAN | Dehydrogenase/reductase SDR family member 4             | 3  | 1,5E-03 | 2,81 | 5,9E-01 | 1,73 | 8,6E-01 | 0,95 |
| HNRPD_HUMAN | Heterogeneous nuclear ribonucleoprotein D0              | 10 | 2,7E-02 | 2,00 | 2,0E-01 | 2,05 | 7,5E-01 | 0,95 |
| IKKB_HUMAN  | Inhibitor of nuclear factor kappa-B kinase subunit beta | 3  | 2,0E-04 | 0,09 | 2,1E-01 | 2,27 | 6,7E-01 | 0,94 |
| PSD11_HUMAN | 26S proteasome non-ATPase regulatory subunit 11         | 22 | 4,9E-01 | 1,44 | 4,7E-02 | 4,09 | 6,2E-01 | 0,94 |
| ARL1_HUMAN  | ADP-ribosylation factor-like protein 1                  | 4  | 2,2E-01 | 1,71 | 3,6E-02 | 3,04 | 6,4E-01 | 0,94 |
| DLDH_HUMAN  | Dihydrolipoyl dehydrogenase mitochondrial               | 15 | 2,3E-01 | 1,37 | 2,8E-02 | 3,59 | 7,9E-01 | 0,94 |
| ACSL3_HUMAN | Long-chain-fatty-acid--CoA ligase 3                     | 9  | 3,9E-01 | 0,35 | 2,9E-03 | 4,07 | 8,7E-01 | 0,93 |
| TPM3_HUMAN  | Tropomyosin alpha-3 chain                               | 8  | 6,9E-01 | 1,04 | 2,6E-03 | 0,62 | 6,4E-01 | 0,93 |
| WDR61_HUMAN | WD repeat-containing protein 61                         | 3  | 4,6E-02 | 2,39 | 3,4E-02 | 3,67 | 6,3E-01 | 0,93 |
| BLMH_HUMAN  | Bleomycin hydrolase                                     | 4  | 8,2E-01 | 0,95 | 3,3E-03 | 6,59 | 7,5E-01 | 0,93 |
| NDKB_HUMAN  | Nucleoside diphosphate kinase B                         | 5  | 2,2E-02 | 3,21 | 1,3E-01 | 2,85 | 3,1E-01 | 0,92 |
| PSMD2_HUMAN | 26S proteasome non-ATPase regulatory subunit 2          | 26 | 4,7E-02 | 1,53 | 2,5E-02 | 0,52 | 6,9E-01 | 0,92 |
| FN3K_HUMAN  | Fructosamine-3-kinase                                   | 3  | 9,6E-04 | 4,14 | 3,1E-01 | 0,49 | 5,3E-01 | 0,90 |
| CCAR1_HUMAN | Cell division cycle and apoptosis regulator protein 1   | 2  | 7,8E-01 | 0,79 | 1,5E-02 | 7,41 | 9,0E-01 | 0,90 |
| IDE_HUMAN   | Insulin-degrading enzyme                                | 4  | 4,1E-02 | 2,61 | 4,8E-01 | 1,70 | 7,1E-01 | 0,90 |
| PGAM1_HUMAN | Phosphoglycerate mutase 1                               | 15 | 3,9E-02 | 1,58 | 8,1E-01 | 0,95 | 2,6E-01 | 0,90 |
| RL21_HUMAN  | 60S ribosomal protein L21                               | 9  | 2,0E-01 | 1,30 | 2,7E-04 | 0,54 | 5,7E-01 | 0,89 |

|             |                                                                       |    |         |       |         |       |         |      |
|-------------|-----------------------------------------------------------------------|----|---------|-------|---------|-------|---------|------|
| RLA0_HUMAN  | 60S acidic ribosomal protein P0                                       | 22 | 1,2E-02 | 2,18  | 1,4E-01 | 2,54  | 1,2E-01 | 0,89 |
| SUMF2_HUMAN | Inactive C-alpha-formylglycine-generating enzyme 2                    | 6  | 2,0E-01 | 1,47  | 1,1E-02 | 0,52  | 6,5E-01 | 0,89 |
| PR40A_HUMAN | Pre-mRNA-processing factor 40 homolog A                               | 2  | 9,3E-02 | 0,37  | 1,7E-02 | 3,02  | 6,3E-01 | 0,88 |
| SCRB2_HUMAN | Lysosome membrane protein 2                                           | 15 | 4,2E-02 | 1,82  | 2,1E-01 | 3,19  | 1,7E-01 | 0,88 |
| SC11A_HUMAN | Signal peptidase complex catalytic subunit SEC11A                     | 4  | 1,4E-01 | 2,97  | 3,9E-03 | 0,25  | 6,6E-01 | 0,88 |
| PSB4_HUMAN  | Proteasome subunit beta type-4                                        | 10 | 4,8E-02 | 1,61  | 2,0E-01 | 1,85  | 2,2E-01 | 0,88 |
| CLUS_HUMAN  | Clusterin                                                             | 3  | 7,0E-01 | 1,16  | 3,8E-02 | 5,52  | 2,1E-01 | 0,87 |
| XRN2_HUMAN  | 5'-3' exoribonuclease 2                                               | 2  | 2,0E-02 | 0,60  | 4,2E-01 | 1,67  | 4,3E-01 | 0,87 |
| TYPH_HUMAN  | Thymidine phosphorylase                                               | 12 | 1,5E-02 | 5,76  | 5,6E-01 | 1,47  | 3,3E-01 | 0,87 |
| CH60_HUMAN  | 60 kDa heat shock protein mitochondrial                               | 42 | 3,8E-02 | 2,01  | 1,3E-01 | 1,50  | 2,1E-01 | 0,86 |
| SPF27_HUMAN | Pre-mRNA-splicing factor SPF27                                        | 2  | 8,1E-01 | 0,93  | 5,7E-03 | 2,09  | 6,7E-01 | 0,86 |
| SGTB_HUMAN  | Small glutamine-rich tetratricopeptide repeat-containing protein beta | 2  | 8,2E-01 | 1,07  | 2,8E-02 | 3,88  | 5,3E-01 | 0,86 |
| RL10_HUMAN  | 60S ribosomal protein L10                                             | 14 | 4,1E-01 | 1,18  | 1,1E-03 | 0,55  | 6,0E-01 | 0,86 |
| AIDA_HUMAN  | Axin interactor dorsalization-associated protein                      | 2  | 1,7E-01 | 0,53  | 4,8E-02 | 6,74  | 7,5E-01 | 0,85 |
| HMGB2_HUMAN | High mobility group protein B2                                        | 4  | 3,6E-02 | 2,21  | 6,3E-01 | 1,36  | 7,9E-01 | 0,85 |
| DHSO_HUMAN  | Sorbitol dehydrogenase                                                | 2  | 4,8E-01 | 1,45  | 1,8E-02 | 2,89  | 6,9E-01 | 0,85 |
| MATR3_HUMAN | Matrin-3                                                              | 15 | 1,0E-02 | 1,62  | 7,1E-01 | 0,87  | 4,6E-01 | 0,85 |
| TPSN_HUMAN  | Tapasin                                                               | 2  | 8,9E-01 | 1,09  | 4,3E-02 | 0,53  | 7,6E-01 | 0,85 |
| HSPB6_HUMAN | Heat shock protein beta-6                                             | 7  | 2,9E-02 | 1,67  | 9,8E-02 | 1,86  | 4,3E-01 | 0,85 |
| ADRM1_HUMAN | Proteasomal ubiquitin receptor ADRM1                                  | 4  | 9,3E-02 | 1,61  | 1,6E-02 | 11,43 | 7,0E-01 | 0,84 |
| MARE2_HUMAN | Microtubule-associated protein RP/EB family member 2                  | 6  | 4,2E-04 | 12,28 | 7,8E-01 | 0,93  | 7,9E-01 | 0,84 |
| PSB6_HUMAN  | Proteasome subunit beta type-6                                        | 7  | 2,5E-02 | 1,57  | 4,2E-01 | 0,67  | 2,8E-01 | 0,84 |
| UAP1L_HUMAN | UDP-N-acetylhexosamine pyrophosphorylase-like protein 1               | 5  | 1,3E-02 | 3,30  | 2,0E-01 | 2,12  | 5,0E-01 | 0,84 |
| PSA5_HUMAN  | Proteasome subunit alpha type-5                                       | 10 | 1,0E-02 | 1,73  | 8,3E-01 | 1,07  | 1,1E-01 | 0,84 |
| RUVB2_HUMAN | RuvB-like 2                                                           | 17 | 1,4E-02 | 2,11  | 4,2E-01 | 3,21  | 1,9E-01 | 0,83 |
| LRP1_HUMAN  | Prolow-density lipoprotein receptor-related protein 1                 | 67 | 1,4E-02 | 5,44  | 1,2E-02 | 11,95 | 9,0E-01 | 0,83 |
| H15_HUMAN   | Histone H1.5                                                          | 9  | 5,0E-01 | 1,61  | 2,1E-02 | 0,54  | 5,8E-01 | 0,83 |

|             |                                                          |    |         |      |         |      |         |      |
|-------------|----------------------------------------------------------|----|---------|------|---------|------|---------|------|
| RBM39_HUMAN | RNA-binding protein 39                                   | 4  | 2,1E-02 | 0,43 | 2,4E-01 | 3,43 | 2,4E-01 | 0,83 |
| TRI16_HUMAN | Tripartite motif-containing protein 16                   | 3  | 4,6E-02 | 2,35 | 4,2E-02 | 2,32 | 3,0E-01 | 0,82 |
| FIP1_HUMAN  | Pre-mRNA 3'-end-processing factor FIP1                   | 3  | 4,1E-01 | 0,74 | 3,9E-02 | 0,58 | 3,1E-01 | 0,82 |
| RS15_HUMAN  | 40S ribosomal protein S15                                | 4  | 6,8E-01 | 0,72 | 1,2E-02 | 0,35 | 7,0E-01 | 0,81 |
| CD47_HUMAN  | Leukocyte surface antigen CD47                           | 3  | 4,8E-02 | 1,80 | 7,1E-01 | 1,45 | 3,6E-01 | 0,81 |
| FMOD_HUMAN  | Fibromodulin                                             | 2  | 9,2E-01 | 1,05 | 3,2E-03 | 0,26 | 5,5E-01 | 0,81 |
| GOT1B_HUMAN | Vesicle transport protein GOT1B                          | 2  | 2,4E-01 | 0,51 | 8,8E-04 | 0,37 | 5,9E-01 | 0,81 |
| CIRBP_HUMAN | Cold-inducible RNA-binding protein                       | 6  | 1,1E-01 | 2,74 | 4,6E-02 | 7,51 | 5,3E-01 | 0,80 |
| CO2A1_HUMAN | Collagen alpha-1(II) chain                               | 3  | 7,1E-03 | 3,12 | 4,5E-01 | 1,24 | 2,7E-01 | 0,80 |
| COR1B_HUMAN | Coronin-1B                                               | 15 | 1,6E-02 | 1,75 | 3,3E-01 | 1,60 | 1,4E-01 | 0,79 |
| PDLI7_HUMAN | PDZ and LIM domain protein 7                             | 7  | 8,4E-01 | 0,92 | 1,5E-02 | 6,38 | 6,3E-01 | 0,79 |
| PP4C_HUMAN  | Serine/threonine-protein phosphatase 4 catalytic subunit | 1  | 3,2E-02 | 3,31 | 4,8E-01 | 1,91 | 5,0E-01 | 0,79 |
| STOM_HUMAN  | Erythrocyte band 7 integral membrane protein             | 15 | 3,3E-01 | 1,19 | 3,6E-02 | 2,69 | 2,2E-01 | 0,79 |
| CATB_HUMAN  | Cathepsin B                                              | 18 | 3,0E-01 | 1,22 | 2,1E-02 | 0,59 | 3,3E-01 | 0,78 |
| CUL2_HUMAN  | Cullin-2                                                 | 4  | 4,5E-02 | 5,80 | 3,7E-01 | 3,54 | 1,8E-01 | 0,78 |
| CD82_HUMAN  | CD82 antigen                                             | 2  | 6,5E-03 | 5,94 | 6,8E-01 | 1,40 | 4,7E-01 | 0,78 |
| ACSL1_HUMAN | Long-chain-fatty-acid--CoA ligase 1                      | 2  | 5,8E-04 | 4,01 | 8,0E-01 | 1,18 | 2,8E-01 | 0,77 |
| HSP13_HUMAN | Heat shock 70 kDa protein 13                             | 2  | 1,5E-01 | 1,22 | 4,5E-02 | 2,22 | 4,2E-01 | 0,76 |
| H14_HUMAN   | Histone H1.4                                             | 9  | 7,6E-01 | 1,12 | 8,0E-03 | 0,60 | 3,1E-01 | 0,75 |
| MMP14_HUMAN | Matrix metalloproteinase-14                              | 12 | 1,2E-02 | 2,27 | 9,2E-01 | 1,10 | 2,6E-01 | 0,75 |
| NRBP_HUMAN  | Nuclear receptor-binding protein                         | 2  | 1       | 1,00 | 3,8E-02 | 2,90 | 4,3E-01 | 0,74 |
| HARS1_HUMAN | Histidine--tRNA ligase cytoplasmic                       | 21 | 4,7E-02 | 1,61 | 2,5E-01 | 1,95 | 6,3E-01 | 0,74 |
| CHIP_HUMAN  | E3 ubiquitin-protein ligase CHIP                         | 3  | 1,8E-03 | 3,00 | 5,2E-01 | 2,25 | 4,6E-01 | 0,73 |
| UBP7_HUMAN  | Ubiquitin carboxyl-terminal hydrolase 7                  | 3  | 4,5E-02 | 2,18 | 6,2E-01 | 1,27 | 5,6E-01 | 0,73 |
| TTC37_HUMAN | Tetratricopeptide repeat protein 37                      | 4  | 5,7E-01 | 0,56 | 1,9E-02 | 6,43 | 3,8E-01 | 0,73 |
| TETN_HUMAN  | Tetranectin                                              | 4  | 7,0E-03 | 1,56 | 3,5E-01 | 1,18 | 3,7E-02 | 0,72 |
| RS11_HUMAN  | 40S ribosomal protein S11                                | 11 | 6,9E-01 | 1,10 | 3,7E-02 | 0,62 | 2,2E-01 | 0,72 |
| HSPB7_HUMAN | Heat shock protein beta-7                                | 2  | 3,8E-02 | 2,38 | 3,5E-01 | 2,80 | 3,5E-01 | 0,71 |

|             |                                                          |    |         |       |         |      |         |      |
|-------------|----------------------------------------------------------|----|---------|-------|---------|------|---------|------|
| AMY1_HUMAN  | Alpha-amylase 1                                          | 4  | 5,2E-01 | 1,15  | 2,7E-02 | 0,27 | 4,6E-01 | 0,71 |
| TBCA_HUMAN  | Tubulin-specific chaperone A                             | 2  | 5,2E-01 | 1,22  | 4,1E-03 | 0,29 | 4,1E-01 | 0,71 |
| DEK_HUMAN   | Protein DEK                                              | 4  | 2,9E-04 | 11,18 | 4,4E-01 | 0,40 | 1,6E-01 | 0,70 |
| MYADM_HUMAN | Myeloid-associated differentiation marker                | 2  | 1,7E-01 | 1,40  | 5,7E-03 | 0,58 | 1,2E-01 | 0,68 |
| RBM3_HUMAN  | RNA-binding protein 3                                    | 6  | 7,1E-01 | 0,94  | 3,2E-03 | 0,43 | 2,7E-01 | 0,67 |
| FUMH_HUMAN  | Fumarate hydratase mitochondrial                         | 14 | 5,7E-01 | 1,19  | 5,5E-01 | 1,44 | 4,1E-02 | 0,67 |
| PPP6_HUMAN  | Serine/threonine-protein phosphatase 6 catalytic subunit | 2  | 3,6E-02 | 5,09  | 1,6E-01 | 4,09 | 3,7E-01 | 0,67 |
| A2MG_HUMAN  | Alpha-2-macroglobulin                                    | 6  | 1,6E-01 | 1,25  | 5,2E-01 | 1,19 | 4,3E-02 | 0,66 |
| RL39_HUMAN  | 60S ribosomal protein L39                                | 2  | 3,2E-01 | 2,14  | 3,8E-03 | 0,28 | 4,7E-01 | 0,66 |
| RAP1A_HUMAN | Ras-related protein Rap-1A                               | 1  | 3,4E-01 | 0,68  | 7,4E-03 | 0,33 | 4,8E-01 | 0,66 |
| VP37B_HUMAN | Vacuolar protein sorting-associated protein 37B          | 3  | 3,4E-01 | 1,68  | 4,4E-02 | 0,45 | 5,6E-01 | 0,65 |
| 5NTC_HUMAN  | Cytosolic purine 5'-nucleotidase                         | 4  | 1,6E-01 | 1,46  | 5,1E-01 | 1,42 | 4,1E-02 | 0,65 |
| CNN3_HUMAN  | Calponin-3                                               | 11 | 1,5E-01 | 1,49  | 8,1E-01 | 1,10 | 1,7E-02 | 0,65 |
| AKT3_HUMAN  | RAC-gamma serine/threonine-protein kinase                | 1  | 1       | 1,00  | 7,6E-03 | 2,81 | 4,4E-01 | 0,64 |
| ERLEC_HUMAN | Endoplasmic reticulum lectin 1                           | 3  | 6,5E-01 | 1,19  | 1,7E-01 | 1,68 | 2,8E-02 | 0,64 |
| RS12_HUMAN  | 40S ribosomal protein S12                                | 9  | 3,7E-01 | 1,22  | 4,1E-01 | 1,55 | 1,6E-02 | 0,64 |
| CNRP1_HUMAN | CB1 cannabinoid receptor-interacting protein 1           | 3  | 1,4E-02 | 2,65  | 7,8E-01 | 1,20 | 1,8E-01 | 0,64 |
| SRSF3_HUMAN | Serine/arginine-rich splicing factor 3                   | 4  | 7,8E-02 | 0,69  | 2,2E-01 | 2,12 | 2,7E-02 | 0,63 |
| BET1_HUMAN  | BET1 homolog                                             | 2  | 8,3E-01 | 1,17  | 4,2E-02 | 3,43 | 7,6E-02 | 0,63 |
| ITPA_HUMAN  | Inosine triphosphate pyrophosphatase                     | 3  | 9,5E-01 | 1,08  | 1,2E-01 | 3,96 | 2,6E-02 | 0,63 |
| H2A1J_HUMAN | Histone H2A type 1-J                                     | 2  | 8,0E-01 | 0,92  | 1,9E-01 | 1,62 | 2,3E-02 | 0,62 |
| MIF_HUMAN   | Macrophage migration inhibitory factor                   | 4  | 1,6E-01 | 1,53  | 9,8E-01 | 0,99 | 4,4E-02 | 0,62 |
| ELOC_HUMAN  | Elongin-C                                                | 5  | 2,7E-01 | 1,53  | 1,7E-02 | 0,32 | 3,7E-01 | 0,62 |
| TRFM_HUMAN  | Melanotransferrin                                        | 8  | 2,6E-01 | 1,39  | 4,1E-01 | 1,65 | 3,3E-05 | 0,61 |
| FUBP3_HUMAN | Far upstream element-binding protein 3                   | 7  | 4,2E-02 | 3,44  | 1,3E-01 | 2,71 | 3,8E-02 | 0,61 |
| NDKA_HUMAN  | Nucleoside diphosphate kinase A                          | 6  | 1,5E-01 | 2,01  | 1,8E-02 | 0,33 | 2,1E-01 | 0,60 |
| DDAH2_HUMAN | N(G) N(G)-dimethylarginine dimethylaminohydrolase 2      | 8  | 2,6E-01 | 1,31  | 2,8E-01 | 2,22 | 3,8E-02 | 0,60 |
| RAC1_HUMAN  | Ras-related C3 botulinum toxin substrate 1               | 3  | 1,9E-01 | 1,67  | 7,4E-03 | 0,29 | 3,3E-01 | 0,60 |

|             |                                                                   |    |         |      |         |      |         |      |
|-------------|-------------------------------------------------------------------|----|---------|------|---------|------|---------|------|
| AL1A1_HUMAN | Retinal dehydrogenase 1                                           | 2  | 2,9E-02 | 2,91 | 3,9E-01 | 2,48 | 1,9E-01 | 0,59 |
| DCUP_HUMAN  | Uroporphyrinogen decarboxylase                                    | 5  | 2,6E-01 | 1,46 | 1,3E-02 | 0,41 | 2,3E-01 | 0,59 |
| DUT_HUMAN   | Deoxyuridine 5'-triphosphate nucleotidohydrolase mitochondrial    | 4  | 2,8E-01 | 1,85 | 7,4E-01 | 1,20 | 4,7E-02 | 0,58 |
| TENA_HUMAN  | Tenascin                                                          | 22 | 6,6E-01 | 0,83 | 5,2E-01 | 1,72 | 1,1E-02 | 0,58 |
| LIMS1_HUMAN | LIM and senescent cell antigen-like-containing domain protein 1   | 2  | 1,7E-01 | 2,75 | 5,0E-01 | 1,57 | 1,1E-02 | 0,57 |
| GET3_HUMAN  | ATPase GET3                                                       | 11 | 8,7E-01 | 1,02 | 2,9E-01 | 1,87 | 1,7E-02 | 0,57 |
| RBP56_HUMAN | TATA-binding protein-associated factor 2N                         | 3  | 2,8E-01 | 1,45 | 4,7E-02 | 0,44 | 4,0E-02 | 0,57 |
| LYRIC_HUMAN | Protein LYRIC                                                     | 15 | 1,1E-01 | 0,63 | 9,9E-01 | 0,99 | 1,9E-02 | 0,57 |
| RGN_HUMAN   | Regucalcin                                                        | 2  | 9,4E-03 | 0,66 | 2,5E-01 | 0,69 | 8,9E-02 | 0,57 |
| FETA_HUMAN  | Alpha-fetoprotein                                                 | 7  | 2,1E-01 | 0,69 | 2,7E-02 | 0,61 | 2,7E-02 | 0,56 |
| EHD3_HUMAN  | EH domain-containing protein 3                                    | 6  | 2,8E-01 | 1,29 | 5,6E-01 | 0,63 | 8,9E-03 | 0,55 |
| ERF3B_HUMAN | Eukaryotic peptide chain release factor GTP-binding subunit ERF3B | 2  | 2,9E-02 | 0,16 | 3,8E-01 | 3,43 | 5,8E-01 | 0,55 |
| DESP_HUMAN  | Desmoplakin                                                       | 2  | 2,5E-01 | 2,84 | 7,2E-01 | 1,08 | 2,0E-02 | 0,53 |
| K1C14_HUMAN | Keratin type I cytoskeletal 14                                    | 8  | 1,6E-01 | 1,64 | 7,8E-01 | 0,95 | 3,3E-02 | 0,53 |
| NIBA1_HUMAN | Protein Niban 1                                                   | 3  | 9,2E-01 | 1,09 | 2,6E-02 | 8,90 | 3,0E-01 | 0,51 |
| LKHA4_HUMAN | Leukotriene A-4 hydrolase                                         | 19 | 9,8E-01 | 1,02 | 9,7E-01 | 1,02 | 3,4E-02 | 0,51 |
| ECH1_HUMAN  | Delta(3 5)-Delta(2 4)-dienoyl-CoA isomerase mitochondrial         | 7  | 8,1E-01 | 0,93 | 1,5E-01 | 2,13 | 3,3E-02 | 0,50 |
| MYH10_HUMAN | Myosin-10                                                         | 2  | 7,3E-01 | 0,81 | 9,9E-03 | 0,19 | 3,3E-01 | 0,49 |
| COCA1_HUMAN | Collagen alpha-1(XII) chain                                       | 2  | 5,2E-01 | 0,62 | 2,0E-02 | 0,33 | 3,7E-02 | 0,49 |
| AT2B3_HUMAN | Plasma membrane calcium-transporting ATPase 3                     | 1  | 1,8E-02 | 6,50 | 6,8E-01 | 0,77 | 3,5E-01 | 0,49 |
| ATX2L_HUMAN | Ataxin-2-like protein                                             | 3  | 8,0E-01 | 1,04 | 7,2E-03 | 0,32 | 2,8E-01 | 0,48 |
| ERP44_HUMAN | Endoplasmic reticulum resident protein 44                         | 13 | 1,2E-01 | 0,37 | 6,9E-01 | 1,30 | 4,0E-02 | 0,48 |
| GSTM1_HUMAN | Glutathione S-transferase Mu 1                                    | 1  | 4,1E-01 | 1,19 | 5,8E-04 | 0,27 | 2,8E-01 | 0,48 |
| IMPA1_HUMAN | Inositol monophosphatase 1                                        | 8  | 3,4E-01 | 1,49 | 3,6E-02 | 0,51 | 2,6E-01 | 0,48 |
| BT3L4_HUMAN | Transcription factor BTF3 homolog 4                               | 2  | 3,1E-01 | 1,33 | 3,2E-01 | 0,65 | 3,9E-02 | 0,47 |
| ALG5_HUMAN  | Dolichyl-phosphate beta-glucosyltransferase                       | 3  | 6,0E-01 | 1,57 | 4,7E-02 | 0,38 | 4,0E-02 | 0,47 |
| RL36_HUMAN  | 60S ribosomal protein L36                                         | 6  | 1,3E-01 | 1,80 | 2,7E-02 | 0,42 | 2,5E-01 | 0,46 |

|             |                                                            |    |         |      |         |      |         |      |
|-------------|------------------------------------------------------------|----|---------|------|---------|------|---------|------|
| LSM4_HUMAN  | U6 snRNA-associated Sm-like protein LSm4                   | 2  | 9,1E-01 | 1,06 | 2,1E-01 | 0,71 | 3,3E-02 | 0,45 |
| UBA5_HUMAN  | Ubiquitin-like modifier-activating enzyme 5                | 2  | 7,5E-01 | 1,21 | 8,4E-01 | 1,10 | 1,7E-02 | 0,44 |
| NBAS_HUMAN  | Neuroblastoma-amplified sequence                           | 4  | 6,6E-01 | 1,14 | 5,2E-01 | 0,76 | 4,5E-02 | 0,44 |
| CD276_HUMAN | CD276 antigen                                              | 3  | 4,9E-01 | 1,26 | 1,8E-01 | 2,46 | 5,7E-03 | 0,44 |
| ARC1A_HUMAN | Actin-related protein 2/3 complex subunit 1A               | 5  | 3,7E-02 | 0,38 | 9,3E-01 | 1,11 | 4,0E-01 | 0,42 |
| HMGB1_HUMAN | High mobility group protein B1                             | 5  | 1,4E-01 | 2,28 | 3,7E-02 | 0,26 | 3,5E-01 | 0,42 |
| RFA2_HUMAN  | Replication protein A 32 kDa subunit                       | 3  | 9,5E-01 | 0,97 | 5,1E-01 | 1,69 | 1,4E-02 | 0,38 |
| HEMO_HUMAN  | Hemopexin                                                  | 2  | 2,8E-01 | 0,71 | 4,4E-02 | 0,46 | 1,2E-01 | 0,38 |
| TSP4_HUMAN  | Thrombospondin-4                                           | 3  | 2,2E-01 | 1,46 | 2,4E-02 | 0,42 | 2,4E-02 | 0,38 |
| PTPRS_HUMAN | Receptor-type tyrosine-protein phosphatase S               | 2  | 7,4E-01 | 0,94 | 6,0E-01 | 1,60 | 3,6E-02 | 0,38 |
| CBPN_HUMAN  | Carboxypeptidase N catalytic chain                         | 2  | 6,9E-02 | 1,40 | 2,0E-01 | 3,87 | 2,0E-03 | 0,35 |
| HUTH_HUMAN  | Histidine ammonia-lyase                                    | 2  | 8,7E-01 | 0,94 | 5,3E-01 | 1,70 | 1,3E-02 | 0,33 |
| GDS1_HUMAN  | Rap1 GTPase-GDP dissociation stimulator 1                  | 10 | 5,8E-01 | 1,16 | 4,1E-02 | 0,20 | 1,5E-02 | 0,31 |
| HAP28_HUMAN | 28 kDa heat- and acid-stable phosphoprotein                | 3  | 5,9E-02 | 2,73 | 3,4E-01 | 1,78 | 3,7E-02 | 0,31 |
| VATC1_HUMAN | V-type proton ATPase subunit C 1                           | 2  | 1,9E-01 | 1,23 | 5,8E-01 | 0,72 | 2,7E-02 | 0,31 |
| PRS4_HUMAN  | 26S proteasome regulatory subunit 4                        | 16 | 3,6E-01 | 0,60 | 4,9E-01 | 0,43 | 4,2E-02 | 0,31 |
| RS21_HUMAN  | 40S ribosomal protein S21                                  | 3  | 1,6E-01 | 0,16 | 1,6E-01 | 0,10 | 6,7E-04 | 0,31 |
| FABPH_HUMAN | Fatty acid-binding protein heart                           | 4  | 2,3E-01 | 2,73 | 5,6E-02 | 8,17 | 1,0E-02 | 0,30 |
| VAPB_HUMAN  | Vesicle-associated membrane protein-associated protein B/C | 4  | 4,3E-03 | 0,14 | 2,3E-01 | 0,49 | 1,4E-01 | 0,30 |
| LMNB1_HUMAN | Lamin-B1                                                   | 19 | 8,1E-02 | 5,31 | 7,8E-01 | 0,72 | 4,0E-02 | 0,29 |
| SNX5_HUMAN  | Sorting nexin-5                                            | 7  | 4,3E-01 | 0,50 | 6,6E-01 | 1,33 | 3,9E-02 | 0,27 |
| TRFE_HUMAN  | Serotransferrin                                            | 2  | 3,0E-01 | 0,36 | 7,9E-01 | 1,11 | 1,8E-02 | 0,27 |
| 1433F_HUMAN | 14-3-3 protein eta                                         | 15 | 4,6E-01 | 0,42 | 4,2E-02 | 0,46 | 1,1E-01 | 0,25 |
| HGB1_HUMAN  | Hemoglobin subunit gamma-1                                 | 1  | 2,1E-01 | 1,84 | 7,1E-03 | 0,21 | 3,7E-02 | 0,21 |
| IAH1_HUMAN  | Isoamyl acetate-hydrolyzing esterase 1 homolog             | 3  | 7,0E-01 | 0,76 | 3,8E-01 | 1,49 | 1,4E-02 | 0,21 |
| RN213_HUMAN | E3 ubiquitin-protein ligase RNF213                         | 9  | 6,6E-01 | 1,44 | 2,5E-01 | 0,33 | 3,8E-02 | 0,20 |
| ISOC2_HUMAN | Isochorismatase domain-containing protein 2                | 2  | 8,7E-01 | 0,86 | 3,3E-01 | 1,35 | 4,8E-06 | 0,20 |
| S10A9_HUMAN | Protein S100-A9                                            | 2  | 9,9E-01 | 1,01 | 4,2E-02 | 6,28 | 2,6E-01 | 0,20 |

|             |                              |    |         |      |         |      |         |      |
|-------------|------------------------------|----|---------|------|---------|------|---------|------|
| RS6_HUMAN   | 40S ribosomal protein S6     | 14 | 2,9E-01 | 0,87 | 8,1E-01 | 1,11 | 4,9E-02 | 0,19 |
| SF3A3_HUMAN | Splicing factor 3A subunit 3 | 7  | 4,6E-01 | 3,30 | 7,2E-01 | 1,87 | 1,3E-02 | 0,08 |
