# Supplementary material for: Enhancing the correlation betweenin vitroandin vivoexperiments in dental implant osseointegration: investigating the role of Ca ions
Source: Royal Society of Chemistry journal article supplement (doi:10.1039/d3tb02694a), 2024-01-01
Supplement: d3tb02694a3.pdf [file d3tb02694a3.pdf]

**Supplementary Table 3.** Comparative analysis between the proteomic profiles detected in tissue around UnicCa implants with respect the proteomic profiles obtained with tissue around C implants after 5 days of *in vivo* experimentation. Proteins with  $p \leq 0.05$  (yellow) and a ratio higher than 1.5 in either direction were considered as significantly different. Up-regulated proteins in tissue formed around UnicCa are marked in red, while those downregulated are marked in green.

| Uniprot entry    | Protein name                                                                                      | Unique peptides | p value | Ratio UnicCa/C |
|------------------|---------------------------------------------------------------------------------------------------|-----------------|---------|----------------|
| G1TIB4_RABIT     | 40S ribosomal protein S28                                                                         | 1               | 1,3E-03 | 43,76          |
| G1SGW0_RABIT     | Epithelial membrane protein 3                                                                     | 1               | 1,1E-02 | 7,03           |
| AOA5F9DE69_RABIT | Transmembrane 9 superfamily member                                                                | 1               | 5,9E-03 | 6,69           |
| G1U8K3_RABIT     | ATP-dependent Clp protease proteolytic subunit                                                    | 2               | 1,7E-02 | 4,78           |
| G1T2P2_RABIT     | TANK binding kinase 1                                                                             | 1               | 1,4E-02 | 3,96           |
| AOA5F9C595_RABIT | SWI/SNF related, matrix associated, actin dependent regulator of chromatin, subfamily d, member 3 | 1               | 1,2E-02 | 3,49           |
| G1T8K2_RABIT     | Protein kinase C and casein kinase substrate in neurons 2                                         | 2               | 4,2E-02 | 3,45           |
| G1T4Z0_RABIT     | Formin like 2                                                                                     | 1               | 7,0E-03 | 3,44           |
| G1SP02_RABIT     | Pyruvate dehydrogenase phosphatase regulatory subunit                                             | 1               | 1,1E-02 | 3,41           |
| G1SU66_RABIT     | Four and a half LIM domains 2                                                                     | 1               | 1,3E-02 | 3,13           |
| AOA5F9D404_RABIT | FAD-binding PCMH-type domain-containing protein                                                   | 1               | 4,4E-02 | 3,09           |
| G1TDA7_RABIT     | Cell division cycle 5 like                                                                        | 2               | 3,9E-02 | 3,00           |
| AOA5F9DDK3_RABIT | Uncharacterized protein                                                                           | 1               | 8,0E-03 | 2,97           |
| G1U3G6_RABIT     | Aminoacyl-tRNA hydrolase                                                                          | 2               | 2,0E-02 | 2,71           |
| G1T0U0_RABIT     | Mitochondrial import inner membrane translocase subunit                                           | 1               | 1,5E-02 | 2,56           |
| G1SSF6_RABIT     | J domain-containing protein                                                                       | 1               | 1,3E-02 | 2,51           |
| AOA5F9D316_RABIT | Malic enzyme                                                                                      | 2               | 2,5E-02 | 2,51           |
| AOA5F9DIG7_RABIT | 3-ketodihydrosphingosine reductase                                                                | 1               | 4,9E-02 | 2,45           |
| DHI1_RABIT       | Corticosteroid 11-beta-dehydrogenase isozyme 1                                                    | 5               | 2,7E-02 | 2,40           |
| G1SHF3_RABIT     | Nitrilase 1                                                                                       | 3               | 2,6E-02 | 2,15           |
| G1SYK3_RABIT     | Mitogen-activated protein kinase kinase 4                                                         | 2               | 2,4E-02 | 2,01           |
| AOA5F9DBR7_RABIT | Thioredoxin domain-containing protein 17                                                          | 1               | 3,5E-02 | 1,97           |
| AOA5F9CUK4_RABIT | Polyadenylate-binding protein                                                                     | 2               | 3,5E-02 | 1,74           |
| G1T004_RABIT     | Phosphoacetylglucosamine mutase                                                                   | 9               | 4,3E-02 | 1,72           |

|                  |                                                                         |    |         |      |
|------------------|-------------------------------------------------------------------------|----|---------|------|
| G1TEU8_RABIT     | Tubulin-folding cofactor C                                              | 2  | 1,5E-02 | 1,71 |
| G1SSX5_RABIT     | Methionine--tRNA ligase, cytoplasmic                                    | 4  | 1,3E-02 | 1,69 |
| CASP3_RABIT      | Caspase-3                                                               | 4  | 2,4E-02 | 1,65 |
| G1TNV7_RABIT     | Glycine C-acetyltransferase                                             | 1  | 2,1E-02 | 1,63 |
| AOA5F9D2K5_RABIT | Parathion hydrolase-related protein                                     | 2  | 8,8E-03 | 1,60 |
| PP2AA_RABIT      | Serine/threonine-protein phosphatase 2A catalytic subunit alpha isoform | 1  | 3,4E-02 | 1,57 |
| AOA5F9CRP1_RABIT | Intercellular adhesion molecule 3                                       | 1  | 4,7E-02 | 1,56 |
| AOA5F9DII4_RABIT | Signal recognition particle subunit SRP68                               | 6  | 3,0E-02 | 1,54 |
| AOA5F9CFF7_RABIT | N-acylsphingosine amidohydrolase 1                                      | 5  | 4,4E-02 | 1,52 |
| G1SN15_RABIT     | Probable tRNA N6-adenosine threonylcarbamoyltransferase                 | 3  | 1,8E-02 | 1,52 |
| G1U0M5_RABIT     | Peroxidase                                                              | 6  | 5,4E-03 | 0,66 |
| G1TR82_RABIT     | Tubulin alpha chain                                                     | 2  | 2,8E-03 | 0,58 |
| AOA5F9CJWO_RABIT | Fibronectin                                                             | 0  | 1,4E-02 | 0,53 |
| AOA5F9C4Q6_RABIT | Spermine synthase                                                       | 2  | 4,4E-02 | 0,53 |
| G1T3L2_RABIT     | Eukaryotic translation initiation factor 3 subunit K                    | 3  | 1,8E-02 | 0,50 |
| G1T1Z5_RABIT     | Extracellular matrix protein 1                                          | 12 | 3,6E-02 | 0,44 |
| G1SGQ7_RABIT     | LDL receptor related protein 4                                          | 1  | 3,7E-02 | 0,23 |
| AOA5F9D150_RABIT | Fibulin-5                                                               | 3  | 7,0E-03 | 0,23 |
| G1T3X1_RABIT     | Complement component C9                                                 | 1  | 3,6E-02 | 0,23 |
